# Supplementary material for: Immunization of cows with HIV envelope trimers generates broadly neutralizing antibodies to the V2-apex from the ultralong CDRH3 repertoire
Source: PubMed Central journal article supplement (PMC11412654; doi:10.1371/journal.ppat.1012042), 2024-09-09
Supplement: ppat.1012042.s013.pdf [file ppat.1012042.s013.pdf]

**S1 Table: Neutralization ID<sub>50</sub> titers are shown for IgG purified from sera tested against murine leukemia virus (MLV) for all four cows over the course of immunization. ID<sub>50</sub> values are shown as 1/dilution.**

| <b>MLV</b>                              |                |                  |                |                |
|-----------------------------------------|----------------|------------------|----------------|----------------|
| <b>ID<sub>50</sub><br/>(1/dilution)</b> | <b>Group 1</b> |                  | <b>Group 2</b> |                |
| <b>Day</b>                              | <b>Cow-485</b> | <b>Cow-16157</b> | <b>Cow-488</b> | <b>Cow-491</b> |
| 59                                      | <35            | <35              | <35            | <35            |
| 65                                      | <35            | <35              | <35            | <35            |
| 72                                      | <35            | <35              | <35            | <35            |
| 80                                      | <35            | 37               | <35            | <35            |
| 85                                      | <35            | <35              | <35            | <35            |
| 150                                     | <35            | 303              | <35            | <35            |
| 157                                     | <35            | 70               | <35            | <35            |
| 164                                     | <35            | 49               | <35            | <35            |
| 171                                     | <35            | 50               | <35            | <35            |
| 234                                     | <35            | 175              | <35            | <35            |
| 346                                     | <35            | <35              | <35            | <35            |
| 352                                     | <35            | <35              | <35            | <35            |
| 359                                     | <35            | <35              | <35            | <35            |

| <b>Neutralization ID<sub>50</sub> (1/dilution)</b> |     |     |
|----------------------------------------------------|-----|-----|
| 35                                                 | 150 | 300 |

**S2 Table: Neutralization ID<sub>50</sub> titers are shown for IgG purified from sera from Day 359 of all four cows. Geomean ID<sub>50</sub> values and percent breadth are shown at the bottom of the graph. ID<sub>50</sub> values are shown as 1/dilution.**

| ID <sub>50</sub> (1/dilution) |       | Group1  |           | Group2  |         |
|-------------------------------|-------|---------|-----------|---------|---------|
| Virus                         | Clade | Cow-485 | Cow-16157 | Cow-488 | Cow-491 |
| 246F3                         | AC    | <35     | <35       | 297     | <35     |
| 25710                         | C     | 1521    | 76        | 15193   | <35     |
| 398F1                         | A     | 231     | <35       | 234     | 118     |
| BJOX2000                      | BC    | <35     | <35       | 718     | <35     |
| CE1176                        | C     | 68      | 72        | 672     | <35     |
| CE0217                        | C     | 45      | <35       | 437     | <35     |
| CH119                         | BC    | <35     | <35       | 143     | <35     |
| CNE55                         | AE    | 4258    | 228       | 11923   | 70      |
| CNE8                          | AE    | 581     | 131       | 4048    | 1094    |
| Tro.11                        | B     | <35     | 74        | 59      | 47      |
| X1632                         | G     | 169     | <35       | 461     | 46      |
| X2278                         | B     | <35     | <35       | 65      | <35     |
| Geomean ID <sub>50</sub>      |       | 333     | 104       | 612     | 114     |
| % Breadth                     |       | 58%     | 42%       | 100%    | 42%     |

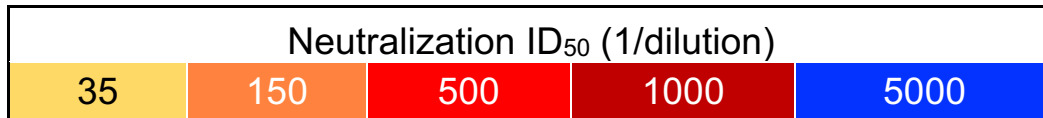

**S3 Table: Neutralization IC<sub>50</sub> (µg/ml) and ID<sub>50</sub> (1/dilution) titers are shown for ID<sub>50</sub> (1/dilution) and IgG purified from sera from Day 359 for cow-485 and cow-488. Geomean IC<sub>50</sub> and ID<sub>50</sub> values are shown at the bottom of the graph.**

| Virus Strain       | Clade   | Bess1 | Bess2 | Bess4  | ElsE1 | ElsE2  | Cow-485 | Cow-488 |
|--------------------|---------|-------|-------|--------|-------|--------|---------|---------|
| 6535.3             | B       | >50   | >50   | >50    | >50   | >50    | <35     | 122     |
| SC422661.8         | B       | >50   | >50   | >50    | >50   | >50    | 36      | <35     |
| PVO.4              | B       | >50   | >50   | >50    | >50   | >50    | <35     | <35     |
| TRO.11             | B       | >50   | >50   | >50    | >50   | >50    | <35     | <35     |
| AC10.0.29          | B       | >50   | >50   | >50    | >50   | >50    | <35     | <35     |
| RHPA4259.7         | B       | >50   | >50   | >50    | >50   | >50    | <35     | <35     |
| TRJO4551.58        | B       | >50   | >50   | >50    | >50   | >50    | <35     | <35     |
| WITO4160.33        | B       | >50   | >50   | >50    | >50   | >50    | <35     | 94      |
| CAAN5342.A2        | B       | >50   | >50   | >50    | >50   | >50    | <35     | <35     |
| WEAU_d15_410_5017  | B (T/F) | >50   | >50   | >50    | >50   | >50    | <35     | <35     |
| 1006_11_C3_1601    | B (T/F) | >50   | >50   | >50    | >50   | >50    | <35     | <35     |
| 1056_10_TA11_1826  | B (T/F) | >50   | >50   | >50    | >50   | >50    | <35     | 43      |
| 1012_11_TC21_3257  | B (T/F) | >50   | >50   | >50    | >50   | >50    | <35     | 56      |
| 6240_08_TA5_4622   | B (T/F) | >50   | >50   | >50    | >50   | >50    | <35     | <35     |
| 6244_13_B5_4576    | B (T/F) | >50   | >50   | >50    | >50   | >50    | <35     | <35     |
| 62357_14_D3_4589   | B (T/F) | >50   | >50   | >50    | >50   | >50    | <35     | <35     |
| Du156.12           | C       | 0.016 | 0.084 | 0.006  | 0.004 | 0.001  | 120     | 11126   |
| ZM197M.PB7         | C       | >50   | 20    | >50    | 36    | 0.607  | <35     | 114     |
| ZM214M.PL15        | C       | >50   | >50   | >50    | >50   | >50    | 318     | <35     |
| ZM233M.PB6         | C       | >50   | 5     | 0.508  | 0.119 | 0.100  | 95      | 264     |
| ZM249M.PL1         | C       | 0.014 | 0.029 | 0.015  | 0.450 | 0.032  | 92      | 318     |
| ZM53M.PB12         | C       | >50   | >50   | 0.014  | 10    | 0.049  | 98      | 280     |
| ZM109F.PB4         | C       | >50   | 0.496 | 0.056  | 0.084 | 0.020  | 224     | 1485    |
| ZM135M.PL10a       | C       | >50   | >50   | >50    | >50   | >50    | <35     | <35     |
| CAP45.2.00.G3      | C       | 0.001 | 0.002 | 0.0006 | 0.027 | 0.0006 | 2126    | 5804    |
| CAP210.2.00.E8     | C       | >50   | 13    | 0.026  | 0.289 | 0.078  | <35     | 154     |
| HIV-0013095-2.11   | C       | >50   | >50   | 0.023  | 0.043 | 0.007  | 38      | 6901    |
| HIV-16055-2.3      | C       | 0.001 | 0.014 | 0.0006 | 0.004 | 0.0006 | 1017    | 14435   |
| Ce0393_C3          | C (T/F) | >50   | 0.302 | 0.008  | 0.387 | 0.033  | 241     | 25670   |
| Ce1176_A3          | C (T/F) | >50   | >50   | 0.049  | 8     | 0.004  | 68      | 672     |
| Ce2010_F5          | C (T/F) | >50   | >50   | >50    | >50   | >50    | <35     | <35     |
| Ce0682_E4          | C (T/F) | >50   | >50   | >50    | >50   | >50    | <35     | 40      |
| Ce1172_H1          | C (T/F) | >50   | >50   | 0.045  | 0.968 | 0.033  | 50      | 358     |
| Ce2060_G9          | C (T/F) | 0.190 | 50    | >50    | >50   | 2      | 412     | 218     |
| Ce703010054_2A2    | C (T/F) | >50   | >50   | >50    | >50   | >50    | <35     | <35     |
| 246F C1G           | C (T/F) | 0.001 | 0.003 | >50    | >50   | >50    | <35     | 58      |
| 249M B10           | C (T/F) | 0.028 | 0.118 | 0.044  | 1     | 0.083  | 69      | 345     |
| ZM247v1(Rev-)      | C (T/F) | 11    | 6     | 5      | >50   | >50    | <35     | 39      |
| 7030102001E5(Rev-) | C (T/F) | >50   | >50   | >50    | >50   | >50    | <35     | <35     |
| 1394C9G1(Rev-)     | C (T/F) | 0.551 | 0.168 | 0.249  | 2     | 0.004  | 2034    | 1345    |
| Ce704809221_1B3    | C (T/F) | >50   | >50   | >50    | >50   | >50    | <35     | <35     |
| CNE19              | BC      | >50   | >50   | >50    | >50   | 0.147  | 72      | 932     |
| CNE20 (CRF07_BC)   | BC      | >50   | >50   | 0.319  | >50   | 0.299  | <35     | 135     |
| CNE17              | BC      | 0.517 | 0.517 | 0.016  | 0.085 | 0.017  | 140     | 851     |

|                 |                |        |       |        |        |        |       |        |
|-----------------|----------------|--------|-------|--------|--------|--------|-------|--------|
| CNE30           | BC             | >50    | >50   | >50    | >50    | >50    | <35   | <35    |
| CNE52           | BC             | 0.290  | 0.290 | >50    | 0.937  | 0.020  | <35   | 498    |
| CNE53           | BC             | >50    | >50   | >50    | >50    | >50    | <35   | <35    |
| CNE58           | BC             | 0.458  | 1     | 0.087  | 4      | 0.044  | 494   | 904    |
| MS208.A1        | A              | >50    | >50   | 18     | 0.566  | 0.082  | <35   | 582    |
| Q23.17          | A              | 1      | 0.163 | 0.006  | 36     | 2      | 48    | <35    |
| Q461.e2         | A              | 0.025  | 0.172 | 0.075  | 1      | 0.105  | <35   | 321    |
| Q769.d22        | A              | >50    | >50   | 0.001  | 1      | 0.078  | 112   | 277    |
| Q259.d2.17      | A              | 0.009  | 0.016 | 0.127  | 7      | 0.024  | <35   | 606    |
| 0330.v4.c3      | A              | 11     | 0.167 | 0.105  | 0.145  | 0.0006 | <35   | 4512   |
| 0260.v5.c36     | A              | >50    | 0.373 | 0.091  | 39     | 18     | <35   | <35    |
| 191955_A11      | A (T/F)        | 0.005  | 0.007 | 0.374  | 1      | 0.001  | 1773  | 780    |
| T257-31         | CRF02_AG       | 0.035  | 0.057 | 0.003  | 0.027  | 0.001  | 2845  | 84     |
| 263-8           | CRF02_AG       | 0.025  | 0.335 | 0.040  | 0.186  | 0.024  | 506   | <35    |
| T250-4          | CRF02_AG       | 0.0006 | 0.002 | 0.067  | 0.005  | 0.006  | 6756  | 10458  |
| T251-18         | CRF02_AG       | >50    | >50   | >50    | >50    | >50    | <35   | <35    |
| T278-50         | CRF02_AG       | >50    | >50   | >50    | 14     | 1      | <35   | <35    |
| T255-34         | CRF02_AG       | >50    | >50   | >50    | >50    | >50    | <35   | <35    |
| 211-9           | CRF02_AG       | >50    | >50   | >50    | >50    | >50    | <35   | <35    |
| 235-47          | CRF02_AG       | >50    | >50   | >50    | 24     | 3      | <35   | <35    |
| 620345.c01      | CRF01_AE       | 0.080  | 0.055 | 0.001  | 0.087  | 0.006  | 160   | 2238   |
| C1080.c03       | CRF01_AE       | >50    | 5     | 0.014  | 0.0006 | 0.0006 | 15010 | 145536 |
| R2184.c04       | CRF01_AE       | 0.062  | 0.654 | 0.007  | 0.481  | 0.024  | 168   | 547    |
| R1166.c01       | CRF01_AE       | >50    | >50   | >50    | >50    | >50    | 393   | 151    |
| R3265.c06       | CRF01_AE       | >50    | 1     | 0.014  | 0.096  | 0.016  | 671   | 611    |
| C3347.c11       | CRF01_AE       | 12     | 0.545 | >50    | >50    | >50    | <35   | <35    |
| C4118.c09       | CRF01_AE       | 0.005  | 0.021 | 0.0006 | 0.0006 | 0.0006 | 1403  | 11276  |
| CNE8            | CRF01_AE       | 0.386  | 0.057 | 0.263  | 0.029  | 0.005  | 581   | 4048   |
| CNE5            | CRF01_AE       | 0.001  | 0.010 | 0.184  | 0.027  | 0.0006 | 2300  | 5281   |
| BJOX009000.02.4 | CRF01_AE       | >50    | >50   | >50    | >50    | >50    | <35   | 58     |
| BJOX015000.11.5 | CRF01_AE (T/F) | >50    | >50   | >50    | >50    | >50    | 293   | 63     |
| BJOX010000.06.2 | CRF01_AE (T/F) | >50    | >50   | >50    | >50    | >50    | <35   | <35    |
| BJOX025000.01.1 | CRF01_AE (T/F) | >50    | >50   | 2      | >50    | >50    | 268   | 53     |
| X1193_C1        | G              | >50    | >50   | >50    | >50    | >50    | <35   | <35    |
| P0402_C2_11     | G              | >50    | >50   | 16     | >50    | 26     | <35   | 103    |
| X1254_C3        | G              | >50    | >50   | >50    | >50    | >50    | <35   | <35    |
| X2088_C9        | G              | >50    | >50   | 0.017  | 0.087  | 0.022  | 456   | 2122   |
| X2131_C1_B5     | G              | >50    | >50   | >50    | >50    | >50    | <35   | <35    |
| P1981_C5_3      | G              | 0.119  | 3     | 0.031  | 0.112  | 0.007  | 78    | 1945   |
| X1632_S2_B10    | G              | 11     | >50   | >50    | 0.231  | 0.024  | 169   | 461    |
| 3016.v5.c45     | D              | >50    | 26    | >50    | 37     | 0.384  | <35   | 35     |
| A07412M1.vrc12  | D              | 0.582  | 0.993 | 50     | 3      | 0.237  | 41    | 261    |
| 231965.c01      | D              | >50    | >50   | 0.040  | >50    | 0.088  | <35   | 327    |
| 231966.c02      | D              | >50    | >50   | >50    | >50    | >50    | <35   | 108    |
| 3817.v2.c59     | CD             | 0.034  | 2     | 0.018  | 0.401  | 0.0006 | 197   | 7236   |
| 6480.v4.c25     | CD             | >50    | >50   | >50    | >50    | >50    | <35   | <35    |
| 6952.v1.c20     | CD             | >50    | >50   | >50    | >50    | >50    | <35   | <35    |
| 6811.v7.c18     | CD             | 0.035  | 0.059 | >50    | >50    | >50    | <35   | <35    |
| 89-F1_2_25      | CD             | >50    | >50   | >50    | >50    | 7      | <35   | <35    |

|                          |     |       |       |       |       |       |                          |      |     |
|--------------------------|-----|-------|-------|-------|-------|-------|--------------------------|------|-----|
| 3301.v1.c24              | AC  | 0.245 | >50   | 0.269 | 8     | 0.454 | <35                      | 45   |     |
| 6041.v3.c23              | AC  | 0.018 | 0.086 | >50   | >50   | >50   | <35                      | <35  |     |
| 6545.v4.c1               | AC  | 0.014 | 0.065 | 0.003 | 0.005 | 0.001 | 35                       | 4006 |     |
| 0815.v3.c3               | ACD | >50   | >50   | >50   | >50   | >50   | <35                      | <35  |     |
| 3103.v3.c10              | ACD | >50   | >50   | >50   | >50   | >50   | <35                      | <35  |     |
| Geomean IC <sub>50</sub> |     | 0.061 | 0.238 | 0.047 | 0.352 | 0.031 | Geomean ID <sub>50</sub> | 276  | 557 |

| Neutralization IC <sub>50</sub> (µg/ml) |   |     |      |       |
|-----------------------------------------|---|-----|------|-------|
| 50                                      | 1 | 0.5 | 0.05 | 0.005 |

| Neutralization ID <sub>50</sub> (1/Dilution) |     |     |      |      |
|----------------------------------------------|-----|-----|------|------|
| 35                                           | 150 | 500 | 1000 | 5000 |

**S4 Table: Table of recovered heavy chains tested with native and universal light chains.**

| Sort Stats and Summary of Screening |                       |                                             | Sort 1       | Sort 2 | Sort 3 | Sort 4 | Short CDRH3 (0-24 AA) | Long CDRH3 (25-49 AA) | Ultralong CDRH3 (50+ AA) |
|-------------------------------------|-----------------------|---------------------------------------------|--------------|--------|--------|--------|-----------------------|-----------------------|--------------------------|
| Cow 485                             | All                   | Cells Sorted                                | 108          | 453    | 559    | 438    | NA                    | NA                    | NA                       |
|                                     |                       | PCR Wells Positive for Heavy Chains         | 34           | 75     | 169    | 52     | NA                    | NA                    | NA                       |
|                                     |                       | Heavy Chain Sequences Recovered             | 13           | 43     | 47     | 49     | 42                    | 72                    | 38                       |
|                                     | Universal Light Chain | Tested IGHV-1*7 Heavy Chains                | 10           | 40     | 30     | NT     | 0                     | 52                    | 28                       |
|                                     |                       | Expressed in Screen                         | 9            | 22     | 25     | NT     | 0                     | 32                    | 24                       |
|                                     |                       | Positive for BG505 Binding                  | 8            | 13     | 12     | NT     | 0                     | 14                    | 19                       |
|                                     |                       | Monoclonals with Cross-Clade Neutralization | 1            | 1      | 4      | 2      | 0                     | 0                     | 8                        |
|                                     | Native Light Chain    | Heavy Chain/Light Chain Pairs               | 12           | 32     | 41     | 49     | 41                    | 63                    | 30                       |
|                                     |                       | Expressed in Screen                         | 9            | 24     | 34     | 45     | 34                    | 53                    | 25                       |
|                                     |                       | Positive for BG505 Binding                  | 7            | 12     | 12     | 20     | 13                    | 22                    | 16                       |
|                                     |                       | Monoclonals with Cross-Clade Neutralization | 1            | 0      | 3      | 2      | 0                     | 0                     | 6                        |
|                                     | Cow 488               | All                                         | Cells Sorted | 33     | 342    | 636    | 283                   | NA                    | NA                       |
| PCR Wells Positive for Heavy Chains |                       |                                             | 6            | 13     | 58     | 54     | NA                    | NA                    | NA                       |
| Heavy Chain Sequences Recovered     |                       |                                             | 1            | 6      | 17     | 49     | 34                    | 4                     | 35                       |
| Universal Light Chain               |                       | IGHV-1*7 Heavy Chains                       | 0            | 2      | 1      | NT     | 1                     | 2                     | 0                        |
|                                     |                       | Expressed in Screen                         | 0            | 2      | 0      | NT     | 0                     | 2                     | 0                        |
|                                     |                       | Positive for BG505 Binding                  | 0            | 2      | 0      | NT     | 0                     | 2                     | 0                        |
|                                     |                       | Monoclonals with Cross-Clade Neutralization | 0            | 0      | 0      | 11     | 0                     | 0                     | 0                        |
| Native Light Chains                 |                       | Heavy Chain/Light Chain Pairs               | 1            | 5      | 16     | 49     | 33                    | 3                     | 35                       |
|                                     |                       | Expressed in Screen                         | 1            | 5      | 10     | 44     | 25                    | 3                     | 32                       |
|                                     |                       | Positive for BG505 Binding                  | 0            | 3      | 3      | 33     | 8                     | 3                     | 28                       |

**S5 Table: ElsE and Bess antibodies were tested for their ability to neutralize the 12-virus global panel. IC<sub>50</sub> (µg/ml), IC<sub>80</sub> (µg/ml), and MPN (%) are shown for all antibodies whose IC<sub>50</sub> reach at least 50% neutralization. MPN= Maximum Percent Neutralized.**

398F1 TRO.11 X2278 25710 CE0217 Ce1176 X1632 246F3 CNE55 CNE8 BJOX CH119

|        |                          | A   | B   | B   | C      | C     | C      | G     | AC    | AE     | AE    | BC    | BC  |
|--------|--------------------------|-----|-----|-----|--------|-------|--------|-------|-------|--------|-------|-------|-----|
| Bess1  | IC <sub>50</sub> (µg/ml) | >50 | >50 | >50 | <0.005 | >50   | >50    | 11    | 0.054 | <0.005 | 0.386 | 0.066 | >50 |
|        | IC <sub>80</sub> (µg/ml) | >50 | >50 | >50 | 0.013  | >50   | >50    | >50   | 0.215 | <0.005 | 2     | 0.315 | >50 |
|        | MPN                      | <50 | <50 | <50 | 100%   | <50   | <50    | 58%   | 94%   | 100%   | 90%   | 94%   | <50 |
| Bess2  | IC <sub>50</sub> (µg/ml) | >50 | >50 | >50 | 0.014  | 0.355 | >50    | >50   | 0.03  | <0.005 | 0.057 | 0.232 | >50 |
|        | IC <sub>80</sub> (µg/ml) | >50 | >50 | >50 | 0.057  | 1     | >50    | >50   | 0.121 | 0.019  | 0.229 | 0.928 | >50 |
|        | MPN                      | <50 | <50 | <50 | 99%    | 88%   | <50    | <50   | 99%   | 100%   | 99%   | 98%   | <50 |
| Bess3  | IC <sub>50</sub> (µg/ml) | >50 | >50 | >50 | 0.067  | >50   | >50    | 6     | 0.063 | 0.042  | 0.603 | 0.067 | >50 |
|        | IC <sub>80</sub> (µg/ml) | >50 | >50 | >50 | 0.268  | >50   | >50    | >50   | 0.250 | 0.170  | 2     | 0.270 | >50 |
|        | MPN                      | <50 | <50 | <50 | 100%   | <50   | <50    | 62%   | 99%   | 100%   | 97%   | 99%   | <50 |
| Bess4  | IC <sub>50</sub> (µg/ml) | >50 | >50 | >50 | 0.064  | 0.127 | 0.049  | >50   | 0.245 | 0.015  | 0.263 | 0.025 | >50 |
|        | IC <sub>80</sub> (µg/ml) | >50 | >50 | >50 | 0.258  | 0.509 | 0.195  | >50   | 0.982 | 0.061  | 1     | 0.098 | >50 |
|        | MPN                      | <50 | <50 | <50 | 98%    | 95%   | 93%    | <50   | 92%   | 100%   | 100%  | 99%   | <50 |
| Bess5  | IC <sub>50</sub> (µg/ml) | >50 | >50 | >50 | >50    | 24    | 13     | >50   | >50   | 0.02   | 0.093 | 14    | >50 |
|        | IC <sub>80</sub> (µg/ml) | >50 | >50 | >50 | >50    | >50   | >50    | >50   | >50   | 0.079  | 1     | >50   | >50 |
|        | MPN                      | <50 | <50 | <50 | <50    | 50%   | 56%    | <50   | <50   | 97%    | 91%   | 62%   | <50 |
| Bess6  | IC <sub>50</sub> (µg/ml) | >50 | >50 | 49  | 41     | >50   | 17     | >50   | >50   | >50    | >50   | >50   | >50 |
|        | IC <sub>80</sub> (µg/ml) | >50 | >50 | >50 | >50    | >50   | 34     | >50   | >50   | >50    | >50   | >50   | >50 |
|        | MPN                      | <50 | <50 | 52% | 58%    | <50   | 87%    | <50   | <50   | <50    | <50   | <50   | <50 |
| Bess7  | IC <sub>50</sub> (µg/ml) | >50 | >50 | >50 | 0.477  | >50   | >50    | >50   | >50   | <0.005 | >50   | 31    | >50 |
|        | IC <sub>80</sub> (µg/ml) | >50 | >50 | >50 | <50    | >50   | >50    | >50   | >50   | 0.02   | >50   | <50   | >50 |
|        | MPN                      | <50 | <50 | <50 | 80%    | <50   | <50    | <50   | <50   | 98%    | <50   | 50%   | <50 |
| Bess8  | IC <sub>50</sub> (µg/ml) | >50 | >50 | >50 | 0.009  | >50   | >50    | >50   | 2     | 0.007  | 9     | 0.21  | >50 |
|        | IC <sub>80</sub> (µg/ml) | >50 | >50 | >50 | 0.525  | >50   | >50    | >50   | 7     | 0.029  | >50   | 0.839 | >50 |
|        | MPN                      | <50 | <50 | <50 | 97%    | <50   | <50    | <50   | 72%   | 97%    | 59%   | 84%   | <50 |
| ElsE1  | IC <sub>50</sub> (µg/ml) | >50 | >50 | >50 | <0.005 | 2     | 8      | 0.231 | 0.058 | <0.005 | 0.029 | 0.033 | >50 |
|        | IC <sub>80</sub> (µg/ml) | >50 | >50 | >50 | 0.019  | >50   | >50    | 0.924 | 0.233 | 0.019  | 0.116 | 0.133 | >50 |
|        | MPN                      | <50 | <50 | <50 | 99%    | 74%   | 66%    | 81%   | 88%   | 99%    | 100%  | 100%  | <50 |
| ElsE2  | IC <sub>50</sub> (µg/ml) | >50 | >50 | >50 | 0.006  | 0.009 | <0.005 | 0.024 | 0.007 | <0.005 | 0.005 | 0.023 | >50 |
|        | IC <sub>80</sub> (µg/ml) | >50 | >50 | >50 | 0.023  | 0.037 | 0.018  | 0.096 | 0.027 | 0.014  | 0.022 | 0.091 | >50 |
|        | MPN                      | <50 | <50 | <50 | 100%   | 94%   | 94%    | 84%   | 96%   | 99%    | 100%  | 100%  | <50 |
| ElsE3  | IC <sub>50</sub> (µg/ml) | >50 | >50 | >50 | <0.005 | 0.009 | 0.062  | 0.161 | 0.153 | 0.007  | 0.009 | 0.026 | >50 |
|        | IC <sub>80</sub> (µg/ml) | >50 | >50 | >50 | 0.015  | 0.035 | 0.249  | 0.643 | 0.611 | 0.027  | 0.034 | 0.103 | >50 |
|        | MPN                      | <50 | <50 | <50 | 100%   | 97%   | 92%    | 84%   | 90%   | 98%    | 100%  | 100%  | <50 |
| ElsE4  | IC <sub>50</sub> (µg/ml) | >50 | >50 | >50 | 0.016  | 23    | >50    | 1     | 2     | <0.005 | 0.011 | 0.035 | >50 |
|        | IC <sub>80</sub> (µg/ml) | >50 | >50 | >50 | 0.062  | >50   | >50    | >50   | >50   | 0.012  | 0.042 | 0.139 | >50 |
|        | MPN                      | <50 | <50 | <50 | 98%    | 54%   | <50    | 74%   | 78%   | 98%    | 100%  | 100%  | <50 |
| ElsE5  | IC <sub>50</sub> (µg/ml) | >50 | >50 | >50 | 0.008  | 26    | >50    | 3     | 3     | 0.008  | 0.011 | 0.031 | >50 |
|        | IC <sub>80</sub> (µg/ml) | >50 | >50 | >50 | 0.032  | >50   | >50    | >50   | >50   | 0.031  | 0.044 | 0.123 | >50 |
|        | MPN                      | <50 | <50 | <50 | 99%    | 52%   | <50    | 68%   | 74%   | 98%    | 100%  | 99%   | <50 |
| ElsE6  | IC <sub>50</sub> (µg/ml) | >50 | >50 | >50 | 0.06   | >50   | >50    | 5     | >50   | 0.033  | 0.023 | 0.013 | >50 |
|        | IC <sub>80</sub> (µg/ml) | >50 | >50 | >50 | 0.238  | >50   | >50    | >50   | >50   | 0.13   | 0.093 | 0.051 | >50 |
|        | MPN                      | <50 | <50 | <50 | 91%    | <50   | <50    | 68%   | <50   | 95%    | 99%   | 99    | <50 |
| ElsE7  | IC <sub>50</sub> (µg/ml) | >50 | >50 | >50 | 0.007  | 0.77  | 5      | 0.022 | 2     | <0.005 | 0.007 | 0.019 | >50 |
|        | IC <sub>80</sub> (µg/ml) | >50 | >50 | >50 | 0.028  | 3     | >50    | 0.087 | >50   | 0.019  | 0.026 | 0.076 | >50 |
|        | MPN                      | <50 | <50 | <50 | 99%    | 80%   | 68%    | 91%   | 78%   | 99%    | 99%   | 100%  | <50 |
| ElsE8  | IC <sub>50</sub> (µg/ml) | >50 | >50 | >50 | 0.023  | 3     | 10     | 0.654 | 0.056 | 0.024  | 0.023 | 0.067 | >50 |
|        | IC <sub>80</sub> (µg/ml) | >50 | >50 | >50 | 0.094  | >50   | >50    | >50   | 0.223 | 0.096  | 0.092 | 0.267 | >50 |
|        | MPN                      | <50 | <50 | <50 | 99%    | 71%   | 60%    | 74%   | 90%   | 97%    | 99%   | 100%  | <50 |
| ElsE9  | IC <sub>50</sub> (µg/ml) | >50 | >50 | >50 | 0.017  | 0.723 | 3      | 0.067 | 0.047 | 0.006  | 0.019 | 0.043 | >50 |
|        | IC <sub>80</sub> (µg/ml) | >50 | >50 | >50 | 0.067  | >50   | >50    | 0.269 | 0.188 | 0.022  | 0.077 | 0.172 | >50 |
|        | MPN                      | <50 | <50 | <50 | 99%    | 75%   | 69%    | 81%   | 92%   | 99%    | 100%  | 100%  | <50 |
| ElsE10 | IC <sub>50</sub> (µg/ml) | >50 | >50 | >50 | 0.025  | >50   | 17     | 11    | >50   | 0.009  | 0.063 | 0.093 | >50 |
|        | IC <sub>80</sub> (µg/ml) | >50 | >50 | >50 | 0.102  | >50   | >50    | >50   | >50   | 0.12   | 0.167 | 0.372 | >50 |
|        | MPN                      | <50 | <50 | <50 | 93%    | <50   | 60%    | 62%   | <50   | 96%    | 98%   | 93%   | <50 |
| ElsE11 | IC <sub>50</sub> (µg/ml) | >50 | >50 | >50 | 0.033  | >50   | >50    | 0.772 | >50   | 0.016  | 0.031 | 0.027 | >50 |
|        | IC <sub>80</sub> (µg/ml) | >50 | >50 | >50 | 0.134  | >50   | >50    | >50   | >50   | 0.064  | 0.161 | 0.283 | >50 |
|        | MPN                      | <50 | <50 | <50 | 93%    | <50   | <50    | 72%   | <50   | 96%    | 98%   | 99%   | <50 |

**S6 Table: X-ray data collection and refinement statistics for Bess and ElsE Fabs.**

|                                       | Fab ElsE1                                                | Fab ElsE2                                                  | Fab ElsE5                                                | Fab ElsE6                          | Fab ElsE7                                      | Fab ElsE8                                      | Fab ElsE9                                                 | Fab ElsE11                                              | Fab Bess4                                      | Fab Bess7                                                                    |
|---------------------------------------|----------------------------------------------------------|------------------------------------------------------------|----------------------------------------------------------|------------------------------------|------------------------------------------------|------------------------------------------------|-----------------------------------------------------------|---------------------------------------------------------|------------------------------------------------|------------------------------------------------------------------------------|
| <b>PDB code</b>                       | 8V4I                                                     | 8VBJ                                                       | 8VBK                                                     | 8VBL                               | 8VBM                                           | 8VBN                                           | 8VBO                                                      | 8VBR                                                    | 8VBP                                           | 8VBQ                                                                         |
| <b>Crystallization condition</b>      | 40% ethylene glycol, 0.1M HEPES, pH 7.5, 5% Peg3000, 20° | 0.1M Tris, pH 8.5, 1.5M ammonium sulfate, 12% glycerol, 4° | 0.1M sodium cacodylate, pH 6.5, 40% MPD, 5% Peg8000, 20° | 0.1M Ches, pH 9.5, 50% Peg200, 20° | 0.1M Ches, pH 9.5, 20% Peg 8000, 4°            | 20% Peg3350, 0.2M KCl, 4°                      | 0.1M sodium cacodylate, pH 6.5, 40% MPD, 5% Peg 8000, 20° | 0.1M Ches, pH 9.5, 50% Peg200, 4°                       | 70% MPD, 0.1M Hepes, pH 7.5, 20°               | 0.095M sodium citrate, pH 5.6, 19% 2-propanol, 5% glycerol, 19% Peg4000, 20° |
| <b>Wavelength</b>                     | 0.97946                                                  | 0.97946                                                    | 1.03317                                                  | 0.97946                            | 0.97946                                        | 0.97741                                        | 0.97946                                                   | 0.97741                                                 | 0.97946                                        | 0.97741                                                                      |
| <b>Beamline</b>                       | SSRL 12-1                                                | SSRL 12-2                                                  | APS 23-ID-B                                              | SSRL 12-2                          | SSRL 12-2                                      | ALS 5.0.1                                      | SSRL 12-1                                                 | ALS 5.0.1                                               | SSRL 12-1                                      | ALS 5.0.1                                                                    |
| <b>Resolution range</b>               | 37.89 - 1.81 (1.88 - 1.81)                               | 45.48 - 1.90 (1.97 - 1.90)                                 | 43.86 - 1.89 (1.96 - 1.89)                               | 46.80 - 2.35 (2.43 - 2.35)         | 42.23 - 2.54 (2.63 - 2.54)                     | 46.95 - 1.83 (1.90 - 1.83)                     | 36.30 - 2.30 (2.38 - 2.30)                                | 49.58 - 2.65 (2.75 - 2.65)                              | 29.94 - 2.80 (2.90 - 2.80)                     | 48.29 - 2.10 (2.18 - 2.10)                                                   |
| <b>Space group/twin law</b>           | C 2 2 2 <sub>1</sub>                                     | C 2 2 2 <sub>1</sub>                                       | P 2 <sub>1</sub> 2 <sub>1</sub> 2 <sub>1</sub>           | P 2 <sub>1</sub> 2 <sub>1</sub> 2  | P 2 <sub>1</sub> 2 <sub>1</sub> 2 <sub>1</sub> | P 2 <sub>1</sub> 2 <sub>1</sub> 2 <sub>1</sub> | P 2 <sub>1</sub> 2 <sub>1</sub> 2                         | P 2 <sub>1</sub> 2 <sub>1</sub> 2 <sub>1</sub> I, h, -k | P 2 <sub>1</sub> 2 <sub>1</sub> 2 <sub>1</sub> | C 2                                                                          |
| <b>Unit cell (Å, °)</b>               | 69.79, 84.12, 174.58, 90, 90, 90                         | 69.96, 178.59, 105.71, 90, 90, 90                          | 56.26, 70.02, 109.08, 90, 90, 90                         | 117.59, 69.98, 77.32, 90, 90, 90   | 58.22, 70.61, 123.97, 90, 90, 90               | 59.22, 120.27, 150.30, 90, 90, 90              | 70.11, 150.89, 51.32, 90, 90, 90                          | 70.05, 70.19, 241.83, 90, 90, 90                        | 66.61, 70.28, 111.46, 90, 90, 90               | 83.00, 69.78, 87.52, 90, 103.52, 90                                          |
| <b>Total reflections</b>              | 460,645 (32,773)                                         | 442,490 (44,977)                                           | 423,944 (39,845)                                         | 168,777 (17,085)                   | 76,645 (6407)                                  | 1,219,769 (90,327)                             | 81,165 (7982)                                             | 378,268 (10,647)                                        | 44,117 (4130)                                  | 98,588 (7823)                                                                |
| <b>Unique reflections</b>             | 45,028 (3292)                                            | 51,939 (5160)                                              | 34,653 (3286)                                            | 27,185 (2649)                      | 16,971 (1511)                                  | 95,768 (9306)                                  | 24,379 (2325)                                             | 33,457 (1618)                                           | 12,710 (1143)                                  | 28,113 (2607)                                                                |
| <b>Multiplicity</b>                   | 10.2 (10.0)                                              | 8.5 (8.7)                                                  | 12.2 (12.1)                                              | 6.2 (6.4)                          | 4.5 (4.2)                                      | 12.8 (9.8)                                     | 3.3 (3.4)                                                 | 11.3 (6.6)                                              | 3.5 (3.3)                                      | 3.5 (3.0)                                                                    |
| <b>Completeness (%)</b>               | 95.6 (70.1)                                              | 98.8 (99.2)                                                | 98.7 (94.9)                                              | 99.7 (98.8)                        | 96.8 (84.6)                                    | 99.8 (98.2)                                    | 97.8 (95.3)                                               | 94.0 (63.9)                                             | 93.8 (87.2)                                    | 98.8 (92.4)                                                                  |
| <b>Mean I/sigma(I)</b>                | 10.5 (0.9)                                               | 8.4 (1.4)                                                  | 13.8 (2.4)                                               | 9.1 (2.4)                          | 7.5 (1.5)                                      | 15.9 (1.3)                                     | 9.3 (2.5)                                                 | 11.3 (6.6)                                              | 7.0 (3.0)                                      | 8.7 (1.2)                                                                    |
| <b>Wilson B-factor</b>                | 34                                                       | 23                                                         | 27                                                       | 34                                 | 44                                             | 26                                             | 44                                                        | 51                                                      | 38                                             | 32                                                                           |
| <b>R-merge (%)</b>                    | 15.5 (251)                                               | 22.4 (224)                                                 | 11.8 (109)                                               | 19.8 (140)                         | 16.4 (135)                                     | 11.6 (173)                                     | 9.2 (77.8)                                                | 9.0 (84.8)                                              | 19.1 (80.5)                                    | 15.2 (107)                                                                   |
| <b>R-meas (%)</b>                     | 16.2 (264)                                               | 23.8 (238)                                                 | 12.3 (114)                                               | 21.7 (152)                         | 18.6 (155)                                     | 12.0 (183)                                     | 10.8 (90.9)                                               | 9.4 (91.4)                                              | 22.4 (95.9)                                    | 17.9 (128)                                                                   |
| <b>R-pim (%)</b>                      | 4.6 (77.2)                                               | 7.9 (77.6)                                                 | 3.5 (32.3)                                               | 8.6 (59.4)                         | 8.6 (74.2)                                     | 3.3 (57.5)                                     | 5.6 (46.2)                                                | 2.7 (32.0)                                              | 11.5 (51.0)                                    | 9.3 (70.3)                                                                   |
| <b>CC1/2 (%)</b>                      | 99.6 (41.0)                                              | 99.5 (41.3)                                                | 99.8 (86.7)                                              | 99.3 (49.7)                        | 99.0 (40.0)                                    | 99.9 (50.8)                                    | 99.5 (61.1)                                               | 99.0 (77.4)                                             | 97.3 (49.8)                                    | 99.2 (37.6)                                                                  |
| <b>Reflections used in refinement</b> | 44,983 (3264)                                            | 51,917 (5148)                                              | 34,637 (3277)                                            | 27,183 (2649)                      | 16,886 (1437)                                  | 95,655 (9237)                                  | 24,379 (2325)                                             | 33,316 (2271)                                           | 12,577 (1141)                                  | 28,099 (2601)                                                                |
| <b>Reflections used for R-free</b>    | 2273 (190)                                               | 2580 (266)                                                 | 1773 (159)                                               | 1331 (141)                         | 783 (77)                                       | 1970 (191)                                     | 1175 (117)                                                | 1993 (138)                                              | 620 (62)                                       | 1348 (114)                                                                   |
| <b>R-work (%)</b>                     | 22.1 (41.1)                                              | 19.5 (35.0)                                                | 20.4 (33.9)                                              | 19.7 (27.7)                        | 23.5 (37.8)                                    | 22.4 (37.5)                                    | 24.8 (34.1)                                               | 24.7 (49.7)                                             | 19.6 (26.2)                                    | 23.0 (32.5)                                                                  |
| <b>R-free (%)</b>                     | 25.7 (55.6)                                              | 22.9 (37.2)                                                | 24.5 (39.3)                                              | 24.4 (34.5)                        | 29.0 (46.8)                                    | 25.8 (39.6)                                    | 28.0 (38.9)                                               | 26.0 (56.4)                                             | 23.2 (30.9)                                    | 26.7 (30.7)                                                                  |
| <b>Number of non-hydrogen atoms</b>   | 3750                                                     | 3889                                                       | 3707                                                     | 3593                               | 3463                                           | 7146                                           | 3535                                                      | 7026                                                    | 3257                                           | 3715                                                                         |
| <b>macromolecules</b>                 | 3563                                                     | 3555                                                       | 3496                                                     | 3477                               | 3463                                           | 6755                                           | 3465                                                      | 7026                                                    | 3257                                           | 3569                                                                         |
| <b>solvent</b>                        | 191                                                      | 334                                                        | 211                                                      | 116                                | 0                                              | 681                                            | 70                                                        | 0                                                       | 0                                              | 142                                                                          |
| <b>Protein residues</b>               | 479                                                      | 477                                                        | 473                                                      | 475                                | 472                                            | 915                                            | 469                                                       | 956                                                     | 441                                            | 486                                                                          |
| <b>RMS(bonds)</b>                     | 0.003                                                    | 0.013                                                      | 0.003                                                    | 0.002                              | 0.002                                          | 0.008                                          | 0.002                                                     | 0.003                                                   | 0.003                                          | 0.003                                                                        |



|                                                    |                |                |                |               |                |                   |                   |                   |                   |                   |
|----------------------------------------------------|----------------|----------------|----------------|---------------|----------------|-------------------|-------------------|-------------------|-------------------|-------------------|
| <b>RMS(angles)</b>                                 | 0.66           | 1.05           | 0.64           | 0.56          | 0.51           | 0.98              | 0.53              | 0.56              | 0.58              | 0.56              |
| <b>Ramachandran favored, allowed, outliers (%)</b> | 94.3, 5.3, 0.4 | 97.5, 2.5, 0.0 | 96.8, 3.2, 0.0 | 96.2,3.4, 0.4 | 94.6, 4.7, 0.6 | 96.56, 3.33, 0.11 | 94.58, 4.34, 1.08 | 95.25, 4.11, 0.63 | 95.17, 4.37, 0.46 | 95.23, 4.77, 0.00 |
| <b>Rotamer outliers (%)</b>                        | 1.94           | 2.18           | 0.99           | 1.23          | 1.75           | 1.79              | 1.76              | 1.84              | 1.58              | 0.73              |
| <b>Clashscore</b>                                  | 3.3            | 1.9            | 1.3            | 3.2           | 4.6            | 2.4               | 3.7               | 2.9               | 2.2               | 1.7               |
| <b>Average B-factor</b>                            | 45             | 31             | 35             | 43            | 65             | 35                | 63                | 59                | 36                | 47                |
| <b>macromolecules</b>                              | 45             | 31             | 35             | 43            | 65             | 35                | 63                | 59                | 36                | 48                |
| <b>solvent</b>                                     | 44             | 35             | 36             | 41            | NA             | 37                | 72                | NA                | NA                | 37                |

Statistics for the highest-resolution shell are shown in parentheses.

**S7 Table: Secondary structural elements in stalk/knob regions.** #=residue number, AA=residue type, and SS=secondary structure type. DSSP was used to assign the secondary structure type for residues in stalk/knob regions from the crystal structures [86]. SS are designated as:  $\alpha$ -helix: H,  $3_{10}$  helix :G, extended strand: E, bend: S, hydrogen bonded turn: T. Blank fields have 'coil' secondary structure. Blank AA fields indicate unmodeled residues. Residues at the tips of the two knob 'loops' (114-118 and 127 -133 in the ElsE Fabs and 114-120 and 132-137 in Bess7) are highlighted in bold; these might be expected to interact with Env.

|     | Bess7    |          | ElsE1    |          | ElsE2    |          | ElsE5    |          | ElsE6    |          | ElsE7    |          | ElsE8    |          | ElsE9    |          | ElsE11_1 |          | ElsE11_2 |          |
|-----|----------|----------|----------|----------|----------|----------|----------|----------|----------|----------|----------|----------|----------|----------|----------|----------|----------|----------|----------|----------|
| #   | AA       | SS       | AA       | SS       | AA       | SS       | AA       | SS       | AA       | SS       | AA       | SS       | AA       | SS       | AA       | SS       | AA       | SS       | AA       | SS       |
| 92  | C        |          | C        |          | C        |          | C        |          | C        |          | C        |          | C        |          | C        |          | C        |          | C        |          |
| 93  | T        |          | T        |          | T        |          | T        |          | T        |          | T        |          | T        |          | T        |          | T        |          | T        |          |
| 94  | T        | E        | T        | E        | T        | E        | T        | E        | T        | E        | T        | E        | A        | E        | T        |          | T        | E        | T        |          |
| 95  | V        | E        | V        | E        | V        | E        | V        | E        | V        | E        | V        | E        | V        | E        | V        | E        | V        | E        | V        | E        |
| 96  | H        | E        | H        | E        | H        | E        | H        | E        | H        | E        | H        | E        | V        | E        | R        | E        | R        | E        | R        | E        |
| 97  | Q        | E        | Q        | E        | Q        | E        | Q        | E        | Q        | E        | Q        | E        | Q        | E        | Q        | E        | Q        | E        | Q        | E        |
| 98  | T        | E        | Q        | E        | Q        | E        | Q        | E        | Q        | E        | Q        | E        | E        | E        | Q        | E        | Q        | E        | Q        | E        |
| 99  | T        | E        | T        | E        | T        | E        | T        | E        | T        | E        | T        | E        | T        | E        | V        | E        | T        | E        | T        | E        |
| 100 | K        | E        | R        | E        | R        | E        | R        | E        | R        | E        | R        | E        | R        | E        | H        | E        | R        | E        | R        | E        |
| 101 | T        |          | K        | E        | K        | E        | K        | E        | K        | E        | K        | E        | K        | E        | K        | E        | K        | E        | K        | E        |
| 102 | T        |          | G        | E        | S        | E        | G        | E        | S        | E        | S        | E        | S        | E        | T        | E        | S        | E        | S        | E        |
| 103 | K        | E        | C        |          | C        |          | C        |          | C        |          | C        |          | C        |          | C        |          | C        |          | C        |          |
| 104 | E        | E        | P        |          | P        |          | P        |          | P        |          | P        |          | P        |          | P        |          | P        |          | P        |          |
| 105 | C        |          | D        | T        | G        | T        | D        | S        | A        | S        | D        | S        | D        | T        | Q        | S        | D        | T        | D        | T        |
| 106 | P        |          | G        | T        | G        | T        | G        | S        | G        | S        | G        | S        | G        | T        | G        | S        | G        | T        | G        | T        |
| 107 | E        | T        | W        |          | Y        |          | W        |          | Y        |          | W        |          | W        |          | W        |          | W        |          | W        |          |
| 108 | G        | T        | R        | E        | T        | E        | S        | E        | T        | E        | M        | E        | R        | E        | R        | E        | T        | E        | T        | E        |
| 109 | Y        |          | F        | E        | F        | E        | F        | E        | L        | E        | F        | E        | F        | E        | F        | E        | L        | E        | L        | E        |
| 110 | N        | E        | G        | H        | G        | G        | G        | T        | A        | T        | G        | S        | G        | T        | G        | H        | A        | H        | A        | H        |
| 111 | W        | E        | W        | H        | Y        | G        | W        | T        | K        | T        | F        | T        | W        | T        | W        | H        | K        | H        | K        | H        |
| 112 | D        |          | D        | H        | D        | G        | D        | T        | D        | T        | D        | T        | D        | T        | D        | H        | D        | H        | D        | H        |
| 113 | D        | S        | C        | H        | C        | G        | C        | T        | C        | T        | C        |          | C        | T        | C        | H        | C        | H        | C        | H        |
| 114 | <b>G</b> |          | <b>G</b> | <b>T</b> | <b>G</b> | <b>T</b> | <b>G</b> | <b>T</b> | <b>G</b> |          |          |          | <b>G</b> | <b>T</b> | <b>G</b> | <b>T</b> | <b>G</b> | <b>T</b> | <b>G</b> | <b>T</b> |
| 115 | <b>C</b> |          | <b>F</b> |          | <b>F</b> |          | <b>F</b> |          |          |          |          |          | <b>F</b> |          | <b>F</b> |          | <b>F</b> |          | <b>F</b> |          |
| 116 | <b>G</b> |          | <b>H</b> |          | <b>H</b> |          |          |          |          |          |          |          | <b>H</b> |          | <b>H</b> |          | <b>Y</b> |          | <b>Y</b> |          |
| 117 | <b>S</b> | <b>G</b> | <b>G</b> | <b>S</b> | <b>G</b> | <b>S</b> |          |          |          |          |          |          | <b>G</b> | <b>S</b> | <b>G</b> | <b>S</b> | <b>G</b> | <b>S</b> | <b>G</b> | <b>S</b> |
| 118 | <b>E</b> | <b>G</b> | <b>Y</b> | <b>T</b> | <b>W</b> | <b>T</b> |          |          |          |          |          |          | <b>Y</b> | <b>T</b> | <b>Y</b> | <b>T</b> | <b>Y</b> | <b>T</b> | <b>Y</b> | <b>T</b> |
| 119 | <b>L</b> | <b>G</b> | <b>G</b> | <b>T</b> | <b>G</b> | <b>T</b> |          |          | <b>G</b> |          | <b>G</b> |          | <b>G</b> | <b>T</b> | <b>G</b> | <b>T</b> | <b>G</b> | <b>T</b> | <b>G</b> | <b>T</b> |
| 120 | <b>G</b> |          | <b>Q</b> | <b>T</b> | <b>S</b> | <b>T</b> | <b>!</b> |          | <b>S</b> | <b>T</b> | <b>S</b> |          | <b>T</b> | <b>T</b> | <b>S</b> | <b>T</b> | <b>S</b> | <b>T</b> | <b>S</b> | <b>T</b> |
| 121 | <b>C</b> |          | <b>E</b> | <b>T</b> | <b>D</b> | <b>T</b> | <b>E</b> |          | <b>E</b> | <b>T</b> | <b>E</b> | <b>S</b> | <b>E</b> | <b>T</b> | <b>D</b> | <b>T</b> | <b>E</b> | <b>T</b> | <b>E</b> | <b>T</b> |
| 122 | <b>G</b> | <b>S</b> | <b>D</b> | <b>S</b> | <b>D</b> | <b>S</b> | <b>D</b> |          | <b>D</b> | <b>S</b> | <b>D</b> | <b>S</b> | <b>D</b> | <b>S</b> | <b>D</b> | <b>S</b> | <b>D</b> |          | <b>D</b> | <b>S</b> |
| 123 | <b>G</b> | <b>S</b> | <b>C</b> | <b>E</b> | <b>C</b> | <b>E</b> | <b>C</b> | <b>E</b> | <b>C</b> | <b>E</b> | <b>C</b> | <b>E</b> | <b>C</b> | <b>E</b> | <b>C</b> | <b>E</b> | <b>C</b> | <b>E</b> | <b>C</b> | <b>E</b> |
| 124 | <b>A</b> | <b>S</b> | <b>Y</b> | <b>E</b> | <b>Y</b> | <b>E</b> | <b>Y</b> | <b>E</b> | <b>Y</b> | <b>E</b> | <b>V</b> | <b>E</b> | <b>Y</b> | <b>E</b> | <b>Y</b> | <b>E</b> | <b>Y</b> | <b>E</b> | <b>Y</b> | <b>E</b> |
| 125 | <b>D</b> | <b>S</b> | <b>E</b> | <b>S</b> | <b>P</b> | <b>S</b> | <b>D</b> | <b>S</b> | <b>D</b> | <b>S</b> | <b>D</b> | <b>S</b> | <b>E</b> | <b>S</b> | <b>E</b> | <b>S</b> | <b>D</b> | <b>S</b> | <b>D</b> | <b>S</b> |
| 126 | <b>C</b> | <b>S</b> | <b>D</b> |          | <b>D</b> | <b>S</b> | <b>D</b> |          | <b>D</b> |          | <b>D</b> |          | <b>D</b> |          | <b>D</b> | <b>S</b> | <b>D</b> |          | <b>D</b> |          |



**S8 Table: Cryo-EM data collection, refinement and validation statistics.**

|                                                  | BG505 SOSIP + Bess4 Fab + RM20A3 Fab<br>(EMD-41498)<br>(PDB: 8TQ1) |
|--------------------------------------------------|--------------------------------------------------------------------|
| <b>Data collection and processing</b>            |                                                                    |
| Microscope                                       | TFS Krios                                                          |
| Magnification                                    | 130,000x                                                           |
| Voltage (kV)                                     | 300                                                                |
| Electron exposure (e-/Å <sup>2</sup> )           | 55.5                                                               |
| Defocus range (µm)                               | -0.7 to -1.7                                                       |
| Detector                                         | Gatan K2 Summit                                                    |
| Recording mode                                   | Counting                                                           |
| Pixel size (Å)                                   | 1.045                                                              |
| Symmetry imposed                                 | C1                                                                 |
| Micrographs (no.)                                | 3,871                                                              |
| Initial particle images (no.)                    | 494,075                                                            |
| Final particle images (no.)                      | 82,374                                                             |
| Map resolution (Å)                               | 3.3                                                                |
| FSC threshold                                    | 0.143                                                              |
| Map sharpening <i>B</i> factor (Å <sup>2</sup> ) | -83.5                                                              |
| Map pixel size (Å)                               | 1.045                                                              |
| Map resolution range (Å)                         | 2.4-5.0                                                            |
| <b>Refinement</b>                                |                                                                    |
| Initial model used (PDB code)                    | 6x9r                                                               |
| Model resolution (Å)                             | 3.3                                                                |
| FSC threshold                                    | 0.5                                                                |
| Model resolution range (Å)                       | 2.4-4.0                                                            |
| EMRinger score                                   | 3.95                                                               |
| Model composition                                |                                                                    |
| Non-hydrogen atoms                               | 19,788                                                             |
| Protein residues                                 | 2,400                                                              |
| Ligands                                          | 79                                                                 |
| Mean <i>B</i> factors (Å <sup>2</sup> )          |                                                                    |
| Protein                                          | 71                                                                 |
| Ligand                                           | 96                                                                 |
| R.m.s. deviations                                |                                                                    |
| Bond lengths (Å)                                 | 0.006                                                              |
| Bond angles (°)                                  | 1.125                                                              |
| Validation                                       |                                                                    |
| MolProbity score                                 | 1.11                                                               |
| Clashscore                                       | 1.49                                                               |
| Poor rotamers (%)                                | 0.19                                                               |
| Ramachandran plot                                |                                                                    |
| Favored (%)                                      | 96.54                                                              |
| Allowed (%)                                      | 3.46                                                               |
| Disallowed (%)                                   | 0.00                                                               |
