# Supplementary material for: Immunization of cows with HIV envelope trimers generates broadly neutralizing antibodies to the V2-apex from the ultralong CDRH3 repertoire
Source: PubMed Central journal article supplement (PMC11412654; doi:10.1371/journal.ppat.1012042), 2024-09-09

**S2 Table: Neutralization ID<sub>50</sub> titers are shown for IgG purified from sera from Day 359 of all four cows. Geomean ID<sub>50</sub> values and percent breadth are shown at the bottom of the graph. ID<sub>50</sub> values are shown as 1/dilution.**

| ID <sub>50</sub> (1/dilution) |       | Group1  |           | Group2  |         |
|-------------------------------|-------|---------|-----------|---------|---------|
| Virus                         | Clade | Cow-485 | Cow-16157 | Cow-488 | Cow-491 |
| 246F3                         | AC    | <35     | <35       | 297     | <35     |
| 25710                         | C     | 1521    | 76        | 15193   | <35     |
| 398F1                         | A     | 231     | <35       | 234     | 118     |
| BJOX2000                      | BC    | <35     | <35       | 718     | <35     |
| CE1176                        | C     | 68      | 72        | 672     | <35     |
| CE0217                        | C     | 45      | <35       | 437     | <35     |
| CH119                         | BC    | <35     | <35       | 143     | <35     |
| CNE55                         | AE    | 4258    | 228       | 11923   | 70      |
| CNE8                          | AE    | 581     | 131       | 4048    | 1094    |
| Tro.11                        | B     | <35     | 74        | 59      | 47      |
| X1632                         | G     | 169     | <35       | 461     | 46      |
| X2278                         | B     | <35     | <35       | 65      | <35     |
| Geomean ID <sub>50</sub>      |       | 333     | 104       | 612     | 114     |
| % Breadth                     |       | 58%     | 42%       | 100%    | 42%     |

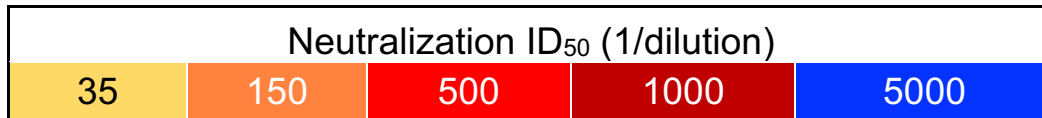

Supplement: ppat.1012042.s014.pdf [file ppat.1012042.s014.pdf]
