# Supplementary material for: Immunization of cows with HIV envelope trimers generates broadly neutralizing antibodies to the V2-apex from the ultralong CDRH3 repertoire
Source: PubMed Central journal article supplement (PMC11412654; doi:10.1371/journal.ppat.1012042), 2024-09-09
Supplement: ppat.1012042.s015.pdf [file ppat.1012042.s015.pdf]

**S3 Table: Neutralization IC<sub>50</sub> (µg/ml) and ID<sub>50</sub> (1/dilution) titers are shown for ID<sub>50</sub> (1/dilution) and IgG purified from sera from Day 359 for cow-485 and cow-488. Geomean IC<sub>50</sub> and ID<sub>50</sub> values are shown at the bottom of the graph.**

| Virus Strain       | Clade   | Bess1 | Bess2 | Bess4  | ElsE1 | ElsE2  | Cow-485 | Cow-488 |
|--------------------|---------|-------|-------|--------|-------|--------|---------|---------|
| 6535.3             | B       | >50   | >50   | >50    | >50   | >50    | <35     | 122     |
| SC422661.8         | B       | >50   | >50   | >50    | >50   | >50    | 36      | <35     |
| PVO.4              | B       | >50   | >50   | >50    | >50   | >50    | <35     | <35     |
| TRO.11             | B       | >50   | >50   | >50    | >50   | >50    | <35     | <35     |
| AC10.0.29          | B       | >50   | >50   | >50    | >50   | >50    | <35     | <35     |
| RHPA4259.7         | B       | >50   | >50   | >50    | >50   | >50    | <35     | <35     |
| TRJO4551.58        | B       | >50   | >50   | >50    | >50   | >50    | <35     | <35     |
| WITO4160.33        | B       | >50   | >50   | >50    | >50   | >50    | <35     | 152     |
| CAAN5342.A2        | B       | >50   | >50   | >50    | >50   | >50    | <35     | <35     |
| WEAU_d15_410_5017  | B (T/F) | >50   | >50   | >50    | >50   | >50    | <35     | <35     |
| 1006_11_C3_1601    | B (T/F) | >50   | >50   | >50    | >50   | >50    | <35     | <35     |
| 1056_10_TA11_1826  | B (T/F) | >50   | >50   | >50    | >50   | >50    | <35     | 43      |
| 1012_11_TC21_3257  | B (T/F) | >50   | >50   | >50    | >50   | >50    | <35     | 56      |
| 6240_08_TA5_4622   | B (T/F) | >50   | >50   | >50    | >50   | >50    | <35     | <35     |
| 6244_13_B5_4576    | B (T/F) | >50   | >50   | >50    | >50   | >50    | <35     | <35     |
| 62357_14_D3_4589   | B (T/F) | >50   | >50   | >50    | >50   | >50    | <35     | <35     |
| Du156.12           | C       | 0.016 | 0.084 | 0.006  | 0.004 | 0.001  | 120     | 11126   |
| ZM197M.PB7         | C       | >50   | 20    | >50    | 36    | 0.607  | <35     | 114     |
| ZM214M.PL15        | C       | >50   | >50   | >50    | >50   | >50    | 318     | <35     |
| ZM233M.PB6         | C       | >50   | 5     | 0.508  | 0.119 | 0.100  | 822     | 3830    |
| ZM249M.PL1         | C       | 0.014 | 0.029 | 0.015  | 0.450 | 0.032  | 92      | 318     |
| ZM53M.PB12         | C       | >50   | >50   | 0.014  | 10    | 0.049  | 98      | 280     |
| ZM109F.PB4         | C       | >50   | 0.496 | 0.056  | 0.084 | 0.020  | 224     | 1485    |
| ZM135M.PL10a       | C       | >50   | >50   | >50    | >50   | >50    | <35     | <35     |
| CAP45.2.00.G3      | C       | 0.001 | 0.002 | 0.0006 | 0.027 | 0.0006 | 2126    | 5804    |
| CAP210.2.00.E8     | C       | >50   | 13    | 0.026  | 0.289 | 0.078  | <35     | 154     |
| HIV-0013095-2.11   | C       | >50   | >50   | 0.023  | 0.043 | 0.007  | 38      | 6901    |
| HIV-16055-2.3      | C       | 0.001 | 0.014 | 0.0006 | 0.004 | 0.0006 | 1017    | 14435   |
| Ce0393_C3          | C (T/F) | >50   | 0.302 | 0.008  | 0.387 | 0.033  | 241     | 25670   |
| Ce1176_A3          | C (T/F) | >50   | >50   | 0.049  | 8     | 0.004  | 68      | 672     |
| Ce2010_F5          | C (T/F) | >50   | >50   | >50    | >50   | >50    | <35     | <35     |
| Ce0682_E4          | C (T/F) | >50   | >50   | >50    | >50   | >50    | <35     | 40      |
| Ce1172_H1          | C (T/F) | >50   | >50   | 0.045  | 0.968 | 0.033  | 50      | 358     |
| Ce2060_G9          | C (T/F) | 0.190 | 50    | >50    | >50   | 2      | 412     | 218     |
| Ce703010054_2A2    | C (T/F) | >50   | >50   | >50    | >50   | >50    | <35     | <35     |
| 246F C1G           | C (T/F) | 0.001 | 0.003 | >50    | >50   | >50    | <35     | 58      |
| 249M B10           | C (T/F) | 0.028 | 0.118 | 0.044  | 1     | 0.083  | 69      | 345     |
| ZM247v1(Rev-)      | C (T/F) | 11    | 6     | 5      | >50   | >50    | <35     | 39      |
| 7030102001E5(Rev-) | C (T/F) | >50   | >50   | >50    | >50   | >50    | <35     | <35     |
| 1394C9G1(Rev-)     | C (T/F) | 0.551 | 0.168 | 0.249  | 2     | 0.004  | 2034    | 1345    |
| Ce704809221_1B3    | C (T/F) | >50   | >50   | >50    | >50   | >50    | <35     | <35     |
| CNE19              | BC      | >50   | >50   | >50    | >50   | 0.147  | 72      | 932     |
| CNE20 (CRF07_BC)   | BC      | >50   | >50   | 0.319  | >50   | 0.299  | <35     | 135     |
| CNE17              | BC      | 0.517 | 0.517 | 0.016  | 0.085 | 0.017  | 140     | 851     |

|                 |                |        |       |        |        |        |       |        |
|-----------------|----------------|--------|-------|--------|--------|--------|-------|--------|
| CNE30           | BC             | >50    | >50   | >50    | >50    | >50    | <35   | <35    |
| CNE52           | BC             | 0.290  | 0.290 | >50    | 0.937  | 0.020  | <35   | 498    |
| CNE53           | BC             | >50    | >50   | >50    | >50    | >50    | <35   | <35    |
| CNE58           | BC             | 0.458  | 1     | 0.087  | 4      | 0.044  | 494   | 904    |
| MS208.A1        | A              | >50    | >50   | 18     | 0.566  | 0.082  | <35   | 582    |
| Q23.17          | A              | 1      | 0.163 | 0.006  | 36     | 2      | 48    | <35    |
| Q461.e2         | A              | 0.025  | 0.172 | 0.075  | 1      | 0.105  | <35   | 321    |
| Q769.d22        | A              | >50    | >50   | 0.001  | 1      | 0.078  | 112   | 277    |
| Q259.d2.17      | A              | 0.009  | 0.016 | 0.127  | 7      | 0.024  | <35   | 606    |
| 0330.v4.c3      | A              | 11     | 0.167 | 0.105  | 0.145  | 0.0006 | <35   | 4512   |
| 0260.v5.c36     | A              | >50    | 0.373 | 0.091  | 39     | 18     | <35   | <35    |
| 191955_A11      | A (T/F)        | 0.005  | 0.007 | 0.374  | 1      | 0.001  | 1773  | 780    |
| T257-31         | CRF02_AG       | 0.035  | 0.057 | 0.003  | 0.027  | 0.001  | 2845  | 84     |
| 263-8           | CRF02_AG       | 0.025  | 0.335 | 0.040  | 0.186  | 0.024  | 506   | <35    |
| T250-4          | CRF02_AG       | 0.0006 | 0.002 | 0.067  | 0.005  | 0.006  | 6756  | 10458  |
| T251-18         | CRF02_AG       | >50    | >50   | >50    | >50    | >50    | <35   | <35    |
| T278-50         | CRF02_AG       | >50    | >50   | >50    | 14     | 1      | <35   | <35    |
| T255-34         | CRF02_AG       | >50    | >50   | >50    | >50    | >50    | <35   | <35    |
| 211-9           | CRF02_AG       | >50    | >50   | >50    | >50    | >50    | <35   | <35    |
| 235-47          | CRF02_AG       | >50    | >50   | >50    | 24     | 3      | <35   | <35    |
| 620345.c01      | CRF01_AE       | 0.080  | 0.055 | 0.001  | 0.087  | 0.006  | 160   | 2238   |
| C1080.c03       | CRF01_AE       | >50    | 5     | 0.014  | 0.0006 | 0.0006 | 15010 | 145536 |
| R2184.c04       | CRF01_AE       | 0.062  | 0.654 | 0.007  | 0.481  | 0.024  | 168   | 547    |
| R1166.c01       | CRF01_AE       | >50    | >50   | >50    | >50    | >50    | 393   | 151    |
| R3265.c06       | CRF01_AE       | >50    | 1     | 0.014  | 0.096  | 0.016  | 671   | 611    |
| C3347.c11       | CRF01_AE       | 12     | 0.545 | >50    | >50    | >50    | <35   | <35    |
| C4118.c09       | CRF01_AE       | 0.005  | 0.021 | 0.0006 | 0.0006 | 0.0006 | 1403  | 11276  |
| CNE8            | CRF01_AE       | 0.386  | 0.057 | 0.263  | 0.029  | 0.005  | 581   | 4048   |
| CNE5            | CRF01_AE       | 0.001  | 0.010 | 0.184  | 0.027  | 0.0006 | 2300  | 5281   |
| BJOX009000.02.4 | CRF01_AE       | >50    | >50   | >50    | >50    | >50    | <35   | 58     |
| BJOX015000.11.5 | CRF01_AE (T/F) | >50    | >50   | >50    | >50    | >50    | 293   | 63     |
| BJOX010000.06.2 | CRF01_AE (T/F) | >50    | >50   | >50    | >50    | >50    | <35   | <35    |
| BJOX025000.01.1 | CRF01_AE (T/F) | >50    | >50   | 2      | >50    | >50    | 268   | 53     |
| X1193_C1        | G              | >50    | >50   | >50    | >50    | >50    | <35   | <35    |
| P0402_C2_11     | G              | >50    | >50   | 16     | >50    | 26     | <35   | 103    |
| X1254_C3        | G              | >50    | >50   | >50    | >50    | >50    | <35   | <35    |
| X2088_C9        | G              | >50    | >50   | 0.017  | 0.087  | 0.022  | 456   | 2122   |
| X2131_C1_B5     | G              | >50    | >50   | >50    | >50    | >50    | <35   | <35    |
| P1981_C5_3      | G              | 0.119  | 3     | 0.031  | 0.112  | 0.007  | 78    | 1945   |
| X1632_S2_B10    | G              | 11     | >50   | >50    | 0.231  | 0.024  | 169   | 461    |
| 3016.v5.c45     | D              | >50    | 26    | >50    | 37     | 0.384  | <35   | 35     |
| A07412M1.vrc12  | D              | 0.582  | 0.993 | 50     | 3      | 0.237  | 41    | 261    |
| 231965.c01      | D              | >50    | >50   | 0.040  | >50    | 0.088  | <35   | 327    |
| 231966.c02      | D              | >50    | >50   | >50    | >50    | >50    | <35   | 108    |
| 3817.v2.c59     | CD             | 0.034  | 2     | 0.018  | 0.401  | 0.0006 | 197   | 7236   |
| 6480.v4.c25     | CD             | >50    | >50   | >50    | >50    | >50    | <35   | <35    |
| 6952.v1.c20     | CD             | >50    | >50   | >50    | >50    | >50    | <35   | <35    |
| 6811.v7.c18     | CD             | 0.035  | 0.059 | >50    | >50    | >50    | <35   | <35    |
| 89-F1_2_25      | CD             | >50    | >50   | >50    | >50    | 7      | <35   | <35    |

|                          |     |       |       |       |       |       |                          |      |     |
|--------------------------|-----|-------|-------|-------|-------|-------|--------------------------|------|-----|
| 3301.v1.c24              | AC  | 0.245 | >50   | 0.269 | 8     | 0.454 | <35                      | 45   |     |
| 6041.v3.c23              | AC  | 0.018 | 0.086 | >50   | >50   | >50   | <35                      | <35  |     |
| 6545.v4.c1               | AC  | 0.014 | 0.065 | 0.003 | 0.005 | 0.001 | 35                       | 4006 |     |
| 0815.v3.c3               | ACD | >50   | >50   | >50   | >50   | >50   | <35                      | <35  |     |
| 3103.v3.c10              | ACD | >50   | >50   | >50   | >50   | >50   | <35                      | <35  |     |
| Geomean IC <sub>50</sub> |     | 0.061 | 0.238 | 0.047 | 0.352 | 0.031 | Geomean ID <sub>50</sub> | 291  | 588 |

| Neutralization IC <sub>50</sub> (µg/ml) |   |     |      |       |
|-----------------------------------------|---|-----|------|-------|
| 50                                      | 1 | 0.5 | 0.05 | 0.005 |

| Neutralization ID <sub>50</sub> (1/Dilution) |     |     |      |      |
|----------------------------------------------|-----|-----|------|------|
| 35                                           | 150 | 500 | 1000 | 5000 |

**S4 Table: Table of recovered heavy chains tested with native and universal light chains.**

| Sort Stats and Summary of Screening |                       |                                             | Sort 1       | Sort 2 | Sort 3 | Sort 4 | Short CDRH3 (0-24 AA) | Long CDRH3 (25-49 AA) | Ultralong CDRH3 (50+ AA) |
|-------------------------------------|-----------------------|---------------------------------------------|--------------|--------|--------|--------|-----------------------|-----------------------|--------------------------|
| Cow 485                             | All                   | Cells Sorted                                | 108          | 453    | 559    | 438    | NA                    | NA                    | NA                       |
|                                     |                       | PCR Wells Positive for Heavy Chains         | 34           | 75     | 169    | 52     | NA                    | NA                    | NA                       |
|                                     |                       | Heavy Chain Sequences Recovered             | 13           | 43     | 47     | 49     | 42                    | 72                    | 38                       |
|                                     | Universal Light Chain | Tested IGHV-1*7 Heavy Chains                | 10           | 40     | 30     | NT     | 0                     | 52                    | 28                       |
|                                     |                       | Expressed in Screen                         | 9            | 22     | 25     | NT     | 0                     | 32                    | 24                       |
|                                     |                       | Positive for BG505 Binding                  | 8            | 13     | 12     | NT     | 0                     | 14                    | 19                       |
|                                     |                       | Monoclonals with Cross-Clade Neutralization | 1            | 1      | 4      | 2      | 0                     | 0                     | 8                        |
|                                     | Native Light Chain    | Heavy Chain/Light Chain Pairs               | 12           | 32     | 41     | 49     | 41                    | 63                    | 30                       |
|                                     |                       | Expressed in Screen                         | 9            | 24     | 34     | 45     | 34                    | 53                    | 25                       |
|                                     |                       | Positive for BG505 Binding                  | 7            | 12     | 12     | 20     | 13                    | 22                    | 16                       |
|                                     |                       | Monoclonals with Cross-Clade Neutralization | 1            | 0      | 3      | 2      | 0                     | 0                     | 6                        |
|                                     | Cow 488               | All                                         | Cells Sorted | 33     | 342    | 636    | 283                   | NA                    | NA                       |
| PCR Wells Positive for Heavy Chains |                       |                                             | 6            | 13     | 58     | 54     | NA                    | NA                    | NA                       |
| Heavy Chain Sequences Recovered     |                       |                                             | 1            | 6      | 17     | 49     | 34                    | 4                     | 35                       |
| Universal Light Chain               |                       | IGHV-1*7 Heavy Chains                       | 0            | 2      | 1      | NT     | 1                     | 2                     | 0                        |
|                                     |                       | Expressed in Screen                         | 0            | 2      | 0      | NT     | 0                     | 2                     | 0                        |
|                                     |                       | Positive for BG505 Binding                  | 0            | 2      | 0      | NT     | 0                     | 2                     | 0                        |
|                                     |                       | Monoclonals with Cross-Clade Neutralization | 0            | 0      | 0      | 11     | 0                     | 0                     | 0                        |
| Native Light Chains                 |                       | Heavy Chain/Light Chain Pairs               | 1            | 5      | 16     | 49     | 33                    | 3                     | 35                       |
|                                     |                       | Expressed in Screen                         | 1            | 5      | 10     | 44     | 25                    | 3                     | 32                       |
|                                     |                       | Positive for BG505 Binding                  | 0            | 3      | 3      | 33     | 8                     | 3                     | 28                       |
