# Supplementary material for: Immunization of cows with HIV envelope trimers generates broadly neutralizing antibodies to the V2-apex from the ultralong CDRH3 repertoire
Source: PubMed Central journal article supplement (PMC11412654; doi:10.1371/journal.ppat.1012042), 2024-09-09
Supplement: ppat.1012042.s016.pdf [file ppat.1012042.s016.pdf]

**S4 Table: Table of recovered heavy chains tested with native and universal light chains.**

| Sort Stats and Summary of Screening |                       |                                             | Sort 1       | Sort 2 | Sort 3 | Sort 4 | Short CDRH3 (0-24 AA) | Long CDRH3 (25-49 AA) | Ultralong CDRH3 (50+ AA) |
|-------------------------------------|-----------------------|---------------------------------------------|--------------|--------|--------|--------|-----------------------|-----------------------|--------------------------|
| Cow 485                             | All                   | Cells Sorted                                | 108          | 453    | 559    | 438    | NA                    | NA                    | NA                       |
|                                     |                       | PCR Wells Positive for Heavy Chains         | 34           | 75     | 169    | 52     | NA                    | NA                    | NA                       |
|                                     |                       | Heavy Chain Sequences Recovered             | 13           | 43     | 47     | 49     | 42                    | 72                    | 38                       |
|                                     | Universal Light Chain | Tested IGHV-1*7 Heavy Chains                | 10           | 40     | 30     | NT     | 0                     | 52                    | 28                       |
|                                     |                       | Expressed in Screen                         | 9            | 22     | 25     | NT     | 0                     | 32                    | 24                       |
|                                     |                       | Positive for BG505 Binding                  | 8            | 13     | 12     | NT     | 0                     | 14                    | 19                       |
|                                     |                       | Monoclonals with Cross-Clade Neutralization | 1            | 1      | 4      | 2      | 0                     | 0                     | 8                        |
|                                     | Native Light Chain    | Heavy Chain/Light Chain Pairs               | 12           | 32     | 41     | 49     | 41                    | 63                    | 30                       |
|                                     |                       | Expressed in Screen                         | 9            | 24     | 34     | 45     | 34                    | 53                    | 25                       |
|                                     |                       | Positive for BG505 Binding                  | 7            | 12     | 12     | 20     | 13                    | 22                    | 16                       |
|                                     |                       | Monoclonals with Cross-Clade Neutralization | 1            | 0      | 3      | 2      | 0                     | 0                     | 6                        |
|                                     | Cow 488               | All                                         | Cells Sorted | 33     | 342    | 636    | 283                   | NA                    | NA                       |
| PCR Wells Positive for Heavy Chains |                       |                                             | 6            | 13     | 58     | 54     | NA                    | NA                    | NA                       |
| Heavy Chain Sequences Recovered     |                       |                                             | 1            | 6      | 17     | 49     | 34                    | 4                     | 35                       |
| Universal Light Chain               |                       | IGHV-1*7 Heavy Chains                       | 0            | 2      | 1      | NT     | 1                     | 2                     | 0                        |
|                                     |                       | Expressed in Screen                         | 0            | 2      | 0      | NT     | 0                     | 2                     | 0                        |
|                                     |                       | Positive for BG505 Binding                  | 0            | 2      | 0      | NT     | 0                     | 2                     | 0                        |
|                                     |                       | Monoclonals with Cross-Clade Neutralization | 0            | 0      | 0      | 11     | 0                     | 0                     | 0                        |
| Native Light Chains                 |                       | Heavy Chain/Light Chain Pairs               | 1            | 5      | 16     | 49     | 33                    | 3                     | 35                       |
|                                     |                       | Expressed in Screen                         | 1            | 5      | 10     | 44     | 25                    | 3                     | 32                       |
|                                     |                       | Positive for BG505 Binding                  | 0            | 3      | 3      | 33     | 8                     | 3                     | 28                       |
