# Supplementary material for: Immunization of cows with HIV envelope trimers generates broadly neutralizing antibodies to the V2-apex from the ultralong CDRH3 repertoire
Source: PubMed Central journal article supplement (PMC11412654; doi:10.1371/journal.ppat.1012042), 2024-09-09
Supplement: ppat.1012042.s017.pdf [file ppat.1012042.s017.pdf]

**S5 Table: ElsE and Bess antibodies were tested for their ability to neutralize the 12-virus global panel. IC<sub>50</sub> (µg/ml), IC<sub>80</sub> (µg/ml), and MPN (%) are shown for all antibodies whose IC<sub>50</sub> reach at least 50% neutralization. MPN= Maximum Percent Neutralized.**

398F1 TRO.11 X2278 25710 CE0217 Ce1176 X1632 246F3 CNE55 CNE8 BJOX CH119

|        |                          | A   | B   | B   | C      | C     | C      | G     | AC    | AE     | AE    | BC    | BC  |
|--------|--------------------------|-----|-----|-----|--------|-------|--------|-------|-------|--------|-------|-------|-----|
| Bess1  | IC <sub>50</sub> (µg/ml) | >50 | >50 | >50 | <0.005 | >50   | >50    | 11    | 0.054 | <0.005 | 0.386 | 0.066 | >50 |
|        | IC <sub>80</sub> (µg/ml) | >50 | >50 | >50 | 0.013  | >50   | >50    | >50   | 0.215 | <0.005 | 2     | 0.315 | >50 |
|        | MPN                      | <50 | <50 | <50 | 100%   | <50   | <50    | 58%   | 94%   | 100%   | 90%   | 94%   | <50 |
| Bess2  | IC <sub>50</sub> (µg/ml) | >50 | >50 | >50 | 0.014  | 0.355 | >50    | >50   | 0.03  | <0.005 | 0.057 | 0.232 | >50 |
|        | IC <sub>80</sub> (µg/ml) | >50 | >50 | >50 | 0.057  | 1     | >50    | >50   | 0.121 | 0.019  | 0.229 | 0.928 | >50 |
|        | MPN                      | <50 | <50 | <50 | 99%    | 88%   | <50    | <50   | 99%   | 100%   | 99%   | 98%   | <50 |
| Bess3  | IC <sub>50</sub> (µg/ml) | >50 | >50 | >50 | 0.067  | >50   | >50    | 6     | 0.063 | 0.042  | 0.603 | 0.067 | >50 |
|        | IC <sub>80</sub> (µg/ml) | >50 | >50 | >50 | 0.268  | >50   | >50    | >50   | 0.250 | 0.170  | 2     | 0.270 | >50 |
|        | MPN                      | <50 | <50 | <50 | 100%   | <50   | <50    | 62%   | 99%   | 100%   | 97%   | 99%   | <50 |
| Bess4  | IC <sub>50</sub> (µg/ml) | >50 | >50 | >50 | 0.064  | 0.127 | 0.049  | >50   | 0.245 | 0.015  | 0.263 | 0.025 | >50 |
|        | IC <sub>80</sub> (µg/ml) | >50 | >50 | >50 | 0.258  | 0.509 | 0.195  | >50   | 0.982 | 0.061  | 1     | 0.098 | >50 |
|        | MPN                      | <50 | <50 | <50 | 98%    | 95%   | 93%    | <50   | 92%   | 100%   | 100%  | 99%   | <50 |
| Bess5  | IC <sub>50</sub> (µg/ml) | >50 | >50 | >50 | >50    | 24    | 13     | >50   | >50   | 0.02   | 0.093 | 14    | >50 |
|        | IC <sub>80</sub> (µg/ml) | >50 | >50 | >50 | >50    | >50   | >50    | >50   | >50   | 0.079  | 1     | >50   | >50 |
|        | MPN                      | <50 | <50 | <50 | <50    | 50%   | 56%    | <50   | <50   | 97%    | 91%   | 62%   | <50 |
| Bess6  | IC <sub>50</sub> (µg/ml) | >50 | >50 | 49  | 41     | >50   | 17     | >50   | >50   | >50    | >50   | >50   | >50 |
|        | IC <sub>80</sub> (µg/ml) | >50 | >50 | >50 | >50    | >50   | 34     | >50   | >50   | >50    | >50   | >50   | >50 |
|        | MPN                      | <50 | <50 | 52% | 58%    | <50   | 87%    | <50   | <50   | <50    | <50   | <50   | <50 |
| Bess7  | IC <sub>50</sub> (µg/ml) | >50 | >50 | >50 | 0.477  | >50   | >50    | >50   | >50   | <0.005 | >50   | 31    | >50 |
|        | IC <sub>80</sub> (µg/ml) | >50 | >50 | >50 | <50    | >50   | >50    | >50   | >50   | 0.02   | >50   | <50   | >50 |
|        | MPN                      | <50 | <50 | <50 | 80%    | <50   | <50    | <50   | <50   | 98%    | <50   | 50%   | <50 |
| Bess8  | IC <sub>50</sub> (µg/ml) | >50 | >50 | >50 | 0.009  | >50   | >50    | >50   | 2     | 0.007  | 9     | 0.21  | >50 |
|        | IC <sub>80</sub> (µg/ml) | >50 | >50 | >50 | 0.525  | >50   | >50    | >50   | 7     | 0.029  | >50   | 0.839 | >50 |
|        | MPN                      | <50 | <50 | <50 | 97%    | <50   | <50    | <50   | 72%   | 97%    | 59%   | 84%   | <50 |
| ElsE1  | IC <sub>50</sub> (µg/ml) | >50 | >50 | >50 | <0.005 | 2     | 8      | 0.231 | 0.058 | <0.005 | 0.029 | 0.033 | >50 |
|        | IC <sub>80</sub> (µg/ml) | >50 | >50 | >50 | 0.019  | >50   | >50    | 0.924 | 0.233 | 0.019  | 0.116 | 0.133 | >50 |
|        | MPN                      | <50 | <50 | <50 | 99%    | 74%   | 66%    | 81%   | 88%   | 99%    | 100%  | 100%  | <50 |
| ElsE2  | IC <sub>50</sub> (µg/ml) | >50 | >50 | >50 | 0.006  | 0.009 | <0.005 | 0.024 | 0.007 | <0.005 | 0.005 | 0.023 | >50 |
|        | IC <sub>80</sub> (µg/ml) | >50 | >50 | >50 | 0.023  | 0.037 | 0.018  | 0.096 | 0.027 | 0.014  | 0.022 | 0.091 | >50 |
|        | MPN                      | <50 | <50 | <50 | 100%   | 94%   | 94%    | 84%   | 96%   | 99%    | 100%  | 100%  | <50 |
| ElsE3  | IC <sub>50</sub> (µg/ml) | >50 | >50 | >50 | <0.005 | 0.009 | 0.062  | 0.161 | 0.153 | 0.007  | 0.009 | 0.026 | >50 |
|        | IC <sub>80</sub> (µg/ml) | >50 | >50 | >50 | 0.015  | 0.035 | 0.249  | 0.643 | 0.611 | 0.027  | 0.034 | 0.103 | >50 |
|        | MPN                      | <50 | <50 | <50 | 100%   | 97%   | 92%    | 84%   | 90%   | 98%    | 100%  | 100%  | <50 |
| ElsE4  | IC <sub>50</sub> (µg/ml) | >50 | >50 | >50 | 0.016  | 23    | >50    | 1     | 2     | <0.005 | 0.011 | 0.035 | >50 |
|        | IC <sub>80</sub> (µg/ml) | >50 | >50 | >50 | 0.062  | >50   | >50    | >50   | >50   | 0.012  | 0.042 | 0.139 | >50 |
|        | MPN                      | <50 | <50 | <50 | 98%    | 54%   | <50    | 74%   | 78%   | 98%    | 100%  | 100%  | <50 |
| ElsE5  | IC <sub>50</sub> (µg/ml) | >50 | >50 | >50 | 0.008  | 26    | >50    | 3     | 3     | 0.008  | 0.011 | 0.031 | >50 |
|        | IC <sub>80</sub> (µg/ml) | >50 | >50 | >50 | 0.032  | >50   | >50    | >50   | >50   | 0.031  | 0.044 | 0.123 | >50 |
|        | MPN                      | <50 | <50 | <50 | 99%    | 52%   | <50    | 68%   | 74%   | 98%    | 100%  | 99%   | <50 |
| ElsE6  | IC <sub>50</sub> (µg/ml) | >50 | >50 | >50 | 0.06   | >50   | >50    | 5     | >50   | 0.033  | 0.023 | 0.013 | >50 |
|        | IC <sub>80</sub> (µg/ml) | >50 | >50 | >50 | 0.238  | >50   | >50    | >50   | >50   | 0.13   | 0.093 | 0.051 | >50 |
|        | MPN                      | <50 | <50 | <50 | 91%    | <50   | <50    | 68%   | <50   | 95%    | 99%   | 99    | <50 |
| ElsE7  | IC <sub>50</sub> (µg/ml) | >50 | >50 | >50 | 0.007  | 0.770 | 5      | 0.022 | 2     | <0.005 | 0.007 | 0.019 | >50 |
|        | IC <sub>80</sub> (µg/ml) | >50 | >50 | >50 | 0.028  | 3     | >50    | 0.087 | >50   | 0.019  | 0.026 | 0.076 | >50 |
|        | MPN                      | <50 | <50 | <50 | 99%    | 80%   | 68%    | 91%   | 78%   | 99%    | 99%   | 100%  | <50 |
| ElsE8  | IC <sub>50</sub> (µg/ml) | >50 | >50 | >50 | 0.023  | 3     | 10     | 0.654 | 0.056 | 0.024  | 0.023 | 0.067 | >50 |
|        | IC <sub>80</sub> (µg/ml) | >50 | >50 | >50 | 0.094  | >50   | >50    | >50   | 0.223 | 0.096  | 0.092 | 0.267 | >50 |
|        | MPN                      | <50 | <50 | <50 | 99%    | 71%   | 60%    | 74%   | 90%   | 97%    | 99%   | 100%  | <50 |
| ElsE9  | IC <sub>50</sub> (µg/ml) | >50 | >50 | >50 | 0.017  | 0.723 | 3      | 0.067 | 0.047 | 0.006  | 0.019 | 0.043 | >50 |
|        | IC <sub>80</sub> (µg/ml) | >50 | >50 | >50 | 0.067  | >50   | >50    | 0.269 | 0.188 | 0.022  | 0.077 | 0.172 | >50 |
|        | MPN                      | <50 | <50 | <50 | 99%    | 75%   | 69%    | 81%   | 92%   | 99%    | 100%  | 100%  | <50 |
| ElsE10 | IC <sub>50</sub> (µg/ml) | >50 | >50 | >50 | 0.025  | >50   | 17     | 11    | >50   | 0.009  | 0.063 | 0.093 | >50 |
|        | IC <sub>80</sub> (µg/ml) | >50 | >50 | >50 | 0.102  | >50   | >50    | >50   | >50   | 0.12   | 0.167 | 0.372 | >50 |
|        | MPN                      | <50 | <50 | <50 | 93%    | <50   | 60%    | 62%   | <50   | 96%    | 98%   | 93%   | <50 |
| ElsE11 | IC <sub>50</sub> (µg/ml) | >50 | >50 | >50 | 0.033  | >50   | >50    | 0.772 | >50   | 0.016  | 0.031 | 0.027 | >50 |
|        | IC <sub>80</sub> (µg/ml) | >50 | >50 | >50 | 0.134  | >50   | >50    | >50   | >50   | 0.064  | 0.161 | 0.283 | >50 |
|        | MPN                      | <50 | <50 | <50 | 93%    | <50   | <50    | 72%   | <50   | 96%    | 98%   | 99%   | <50 |
