# Supplementary material for: Immunization of cows with HIV envelope trimers generates broadly neutralizing antibodies to the V2-apex from the ultralong CDRH3 repertoire
Source: PubMed Central journal article supplement (PMC11412654; doi:10.1371/journal.ppat.1012042), 2024-09-09
Supplement: ppat.1012042.s018.pdf [file ppat.1012042.s018.pdf]

**S6 Table: X-ray data collection and refinement statistics for Bess and ElsE Fabs.**

|                                       | Fab ElsE1                                                | Fab ElsE2                                                  | Fab ElsE5                                                | Fab ElsE6                          | Fab ElsE7                                      | Fab ElsE8                                      | Fab ElsE9                                                 | Fab ElsE11                                            | Fab Bess4                                      | Fab Bess7                                                                    |
|---------------------------------------|----------------------------------------------------------|------------------------------------------------------------|----------------------------------------------------------|------------------------------------|------------------------------------------------|------------------------------------------------|-----------------------------------------------------------|-------------------------------------------------------|------------------------------------------------|------------------------------------------------------------------------------|
| <b>PDB code</b>                       | 8V4I                                                     | 8VBJ                                                       | 8VBK                                                     | 8VBL                               | 8VBM                                           | 8VBN                                           | 8VBO                                                      | 8VBR                                                  | 8VBP                                           | 8VBQ                                                                         |
| <b>Crystallization condition</b>      | 40% ethylene glycol, 0.1M HEPES, pH 7.5, 5% Peg3000, 20° | 0.1M Tris, pH 8.5, 1.5M ammonium sulfate, 12% glycerol, 4° | 0.1M sodium cacodylate, pH 6.5, 40% MPD, 5% Peg8000, 20° | 0.1M Ches, pH 9.5, 50% Peg200, 20° | 0.1M Ches, pH 9.5, 20% Peg 8000, 4°            | 20% Peg3350, 0.2M KCl, 4°                      | 0.1M sodium cacodylate, pH 6.5, 40% MPD, 5% Peg 8000, 20° | 0.1M Ches, pH 9.5, 50% Peg200, 4°                     | 70% MPD, 0.1M Hepes, pH 7.5, 20°               | 0.095M sodium citrate, pH 5.6, 19% 2-propanol, 5% glycerol, 19% Peg4000, 20° |
| <b>Wavelength</b>                     | 0.97946                                                  | 0.97946                                                    | 1.03317                                                  | 0.97946                            | 0.97946                                        | 0.97741                                        | 0.97946                                                   | 0.97741                                               | 0.97946                                        | 0.97741                                                                      |
| <b>Beamline</b>                       | SSRL 12-1                                                | SSRL 12-2                                                  | APS 23-ID-B                                              | SSRL 12-2                          | SSRL 12-2                                      | ALS 5.0.1                                      | SSRL 12-1                                                 | ALS 5.0.1                                             | SSRL 12-1                                      | ALS 5.0.1                                                                    |
| <b>Resolution range</b>               | 37.89 - 1.81 (1.88 - 1.81)                               | 45.48 - 1.90 (1.97 - 1.90)                                 | 43.86 - 1.89 (1.96 - 1.89)                               | 46.80 - 2.35 (2.43 - 2.35)         | 42.23 - 2.54 (2.63 - 2.54)                     | 46.95 - 1.83 (1.90 - 1.83)                     | 36.30 - 2.30 (2.38 - 2.30)                                | 49.58 - 2.65 (2.75 - 2.65)                            | 29.94 - 2.80 (2.90 - 2.80)                     | 48.29 - 2.10 (2.18 - 2.10)                                                   |
| <b>Space group/twin law</b>           | C 2 2 2 <sub>1</sub>                                     | C 2 2 2 <sub>1</sub>                                       | P 2 <sub>1</sub> 2 <sub>1</sub> 2 <sub>1</sub>           | P 2 <sub>1</sub> 2 <sub>1</sub> 2  | P 2 <sub>1</sub> 2 <sub>1</sub> 2 <sub>1</sub> | P 2 <sub>1</sub> 2 <sub>1</sub> 2 <sub>1</sub> | P 2 <sub>1</sub> 2 <sub>1</sub> 2                         | P 2 <sub>1</sub> 2 <sub>1</sub> 2 <sub>1</sub> I,h,-k | P 2 <sub>1</sub> 2 <sub>1</sub> 2 <sub>1</sub> | C 2                                                                          |
| <b>Unit cell (Å, °)</b>               | 69.79, 84.12, 174.58, 90, 90, 90                         | 69.96, 178.59, 105.71, 90, 90, 90                          | 56.26, 70.02, 109.08, 90, 90, 90                         | 117.59, 69.98, 77.32, 90, 90, 90   | 58.22, 70.61, 123.97, 90, 90, 90               | 59.22, 120.27, 150.30, 90, 90, 90              | 70.11, 150.89, 51.32, 90, 90, 90                          | 70.05, 70.19, 241.83, 90, 90, 90                      | 66.61, 70.28, 111.46, 90, 90, 90               | 83.00, 69.78, 87.52, 90, 103.52, 90                                          |
| <b>Total reflections</b>              | 460,645 (32,773)                                         | 442,490 (44,977)                                           | 423,944 (39,845)                                         | 168,777 (17,085)                   | 76,645 (6407)                                  | 1,219,769 (90,327)                             | 81,165 (7982)                                             | 378,268 (10,647)                                      | 44,117 (4130)                                  | 98,588 (7823)                                                                |
| <b>Unique reflections</b>             | 45,028 (3292)                                            | 51,939 (5160)                                              | 34,653 (3286)                                            | 27,185 (2649)                      | 16,971 (1511)                                  | 95,768 (9306)                                  | 24,379 (2325)                                             | 33,457 (1618)                                         | 12,710 (1143)                                  | 28,113 (2607)                                                                |
| <b>Multiplicity</b>                   | 10.2 (10.0)                                              | 8.5 (8.7)                                                  | 12.2 (12.1)                                              | 6.2 (6.4)                          | 4.5 (4.2)                                      | 12.8 (9.8)                                     | 3.3 (3.4)                                                 | 11.3 (6.6)                                            | 3.5 (3.3)                                      | 3.5 (3.0)                                                                    |
| <b>Completeness (%)</b>               | 95.6 (70.1)                                              | 98.8 (99.2)                                                | 98.7 (94.9)                                              | 99.7 (98.8)                        | 96.8 (84.6)                                    | 99.8 (98.2)                                    | 97.8 (95.3)                                               | 94.0 (63.9)                                           | 93.8 (87.2)                                    | 98.8 (92.4)                                                                  |
| <b>Mean I/sigma(I)</b>                | 10.5 (0.9)                                               | 8.4 (1.4)                                                  | 13.8 (2.4)                                               | 9.1 (2.4)                          | 7.5 (1.5)                                      | 15.9 (1.3)                                     | 9.3 (2.5)                                                 | 11.3 (6.6)                                            | 7.0 (3.0)                                      | 8.7 (1.2)                                                                    |
| <b>Wilson B-factor</b>                | 34                                                       | 23                                                         | 27                                                       | 34                                 | 44                                             | 26                                             | 44                                                        | 51                                                    | 38                                             | 32                                                                           |
| <b>R-merge (%)</b>                    | 15.5 (251)                                               | 22.4 (224)                                                 | 11.8 (109)                                               | 19.8 (140)                         | 16.4 (135)                                     | 11.6 (173)                                     | 9.2 (77.8)                                                | 9.0 (84.8)                                            | 19.1 (80.5)                                    | 15.2 (107)                                                                   |
| <b>R-meas (%)</b>                     | 16.2 (264)                                               | 23.8 (238)                                                 | 12.3 (114)                                               | 21.7 (152)                         | 18.6 (155)                                     | 12.0 (183)                                     | 10.8 (90.9)                                               | 9.4 (91.4)                                            | 22.4 (95.9)                                    | 17.9 (128)                                                                   |
| <b>R-pim (%)</b>                      | 4.6 (77.2)                                               | 7.9 (77.6)                                                 | 3.5 (32.3)                                               | 8.6 (59.4)                         | 8.6 (74.2)                                     | 3.3 (57.5)                                     | 5.6 (46.2)                                                | 2.7 (32.0)                                            | 11.5 (51.0)                                    | 9.3 (70.3)                                                                   |
| <b>CC1/2 (%)</b>                      | 99.6 (41.0)                                              | 99.5 (41.3)                                                | 99.8 (86.7)                                              | 99.3 (49.7)                        | 99.0 (40.0)                                    | 99.9 (50.8)                                    | 99.5 (61.1)                                               | 99.0 (77.4)                                           | 97.3 (49.8)                                    | 99.2 (37.6)                                                                  |
| <b>Reflections used in refinement</b> | 44,983 (3264)                                            | 51,917 (5148)                                              | 34,637 (3277)                                            | 27,183 (2649)                      | 16,886 (1437)                                  | 95,655 (9237)                                  | 24,379 (2325)                                             | 33,316 (2271)                                         | 12,577 (1141)                                  | 28,099 (2601)                                                                |
| <b>Reflections used for R-free</b>    | 2273 (190)                                               | 2580 (266)                                                 | 1773 (159)                                               | 1331 (141)                         | 783 (77)                                       | 1970 (191)                                     | 1175 (117)                                                | 1993 (138)                                            | 620 (62)                                       | 1348 (114)                                                                   |
| <b>R-work (%)</b>                     | 22.1 (41.1)                                              | 19.5 (35.0)                                                | 20.4 (33.9)                                              | 19.7 (27.7)                        | 23.5 (37.8)                                    | 22.4 (37.5)                                    | 24.8 (34.1)                                               | 24.7 (49.7)                                           | 19.6 (26.2)                                    | 23.0 (32.5)                                                                  |
| <b>R-free (%)</b>                     | 25.7 (55.6)                                              | 22.9 (37.2)                                                | 24.5 (39.3)                                              | 24.4 (34.5)                        | 29.0 (46.8)                                    | 25.8 (39.6)                                    | 28.0 (38.9)                                               | 26.0 (56.4)                                           | 23.2 (30.9)                                    | 26.7 (30.7)                                                                  |
| <b>Number of non-hydrogen atoms</b>   | 3750                                                     | 3889                                                       | 3707                                                     | 3593                               | 3463                                           | 7146                                           | 3535                                                      | 7026                                                  | 3257                                           | 3715                                                                         |
| <b>macromolecules</b>                 | 3563                                                     | 3555                                                       | 3496                                                     | 3477                               | 3463                                           | 6755                                           | 3465                                                      | 7026                                                  | 3257                                           | 3569                                                                         |
| <b>solvent</b>                        | 191                                                      | 334                                                        | 211                                                      | 116                                | 0                                              | 681                                            | 70                                                        | 0                                                     | 0                                              | 142                                                                          |
| <b>Protein residues</b>               | 479                                                      | 477                                                        | 473                                                      | 475                                | 472                                            | 915                                            | 469                                                       | 956                                                   | 441                                            | 486                                                                          |
| <b>RMS(bonds)</b>                     | 0.003                                                    | 0.013                                                      | 0.003                                                    | 0.002                              | 0.002                                          | 0.008                                          | 0.002                                                     | 0.003                                                 | 0.003                                          | 0.003                                                                        |

|                                                    |                |                |                |               |                |                   |                   |                   |                   |                   |
|----------------------------------------------------|----------------|----------------|----------------|---------------|----------------|-------------------|-------------------|-------------------|-------------------|-------------------|
| <b>RMS(angles)</b>                                 | 0.66           | 1.05           | 0.64           | 0.56          | 0.51           | 0.98              | 0.53              | 0.56              | 0.58              | 0.56              |
| <b>Ramachandran favored, allowed, outliers (%)</b> | 94.3, 5.3, 0.4 | 97.5, 2.5, 0.0 | 96.8, 3.2, 0.0 | 96.2,3.4, 0.4 | 94.6, 4.7, 0.6 | 96.56, 3.33, 0.11 | 94.58, 4.34, 1.08 | 95.25, 4.11, 0.63 | 95.17, 4.37, 0.46 | 95.23, 4.77, 0.00 |
| <b>Rotamer outliers (%)</b>                        | 1.94           | 2.18           | 0.99           | 1.23          | 1.75           | 1.79              | 1.76              | 1.84              | 1.58              | 0.73              |
| <b>Clashscore</b>                                  | 3.3            | 1.9            | 1.3            | 3.2           | 4.6            | 2.4               | 3.7               | 2.9               | 2.2               | 1.7               |
| <b>Average B-factor</b>                            | 45             | 31             | 35             | 43            | 65             | 35                | 63                | 59                | 36                | 47                |
| <b>macromolecules</b>                              | 45             | 31             | 35             | 43            | 65             | 35                | 63                | 59                | 36                | 48                |
| <b>solvent</b>                                     | 44             | 35             | 36             | 41            | NA             | 37                | 72                | NA                | NA                | 37                |

Statistics for the highest-resolution shell are shown in parentheses.
