# Supplementary material for: Immunization of cows with HIV envelope trimers generates broadly neutralizing antibodies to the V2-apex from the ultralong CDRH3 repertoire
Source: PubMed Central journal article supplement (PMC11412654; doi:10.1371/journal.ppat.1012042), 2024-09-09
Supplement: ppat.1012042.s019.pdf [file ppat.1012042.s019.pdf]

**S7 Table: Secondary structural elements in stalk/knob regions.** #=residue number, AA=residue type, and SS=secondary structure type. DSSP was used to assign the secondary structure type for residues in stalk/knob regions from the crystal structures [86]. SS are designated as:  $\alpha$ -helix: H,  $3_{10}$  helix :G, extended strand: E, bend: S, hydrogen bonded turn: T. Blank fields have 'coil' secondary structure. Blank AA fields indicate unmodeled residues. Residues at the tips of the two knob 'loops' (114-118 and 127 -133 in the ElsE Fabs and 114-120 and 132-137 in Bess7) are highlighted in bold; these might be expected to interact with Env.

|     | Bess7    |          | ElsE1    |          | ElsE2    |          | ElsE5    |          | ElsE6    |          | ElsE7    |          | ElsE8    |          | ElsE9    |          | ElsE11_1 |          | ElsE11_2 |          |
|-----|----------|----------|----------|----------|----------|----------|----------|----------|----------|----------|----------|----------|----------|----------|----------|----------|----------|----------|----------|----------|
| #   | AA       | SS       | AA       | SS       | AA       | SS       | AA       | SS       | AA       | SS       | AA       | SS       | AA       | SS       | AA       | SS       | AA       | SS       | AA       | SS       |
| 92  | C        |          | C        |          | C        |          | C        |          | C        |          | C        |          | C        |          | C        |          | C        |          | C        |          |
| 93  | T        |          | T        |          | T        |          | T        |          | T        |          | T        |          | T        |          | T        |          | T        |          | T        |          |
| 94  | T        | E        | T        | E        | T        | E        | T        | E        | T        | E        | T        | E        | A        | E        | T        |          | T        | E        | T        |          |
| 95  | V        | E        | V        | E        | V        | E        | V        | E        | V        | E        | V        | E        | V        | E        | V        | E        | V        | E        | V        | E        |
| 96  | H        | E        | H        | E        | H        | E        | H        | E        | H        | E        | H        | E        | V        | E        | R        | E        | R        | E        | R        | E        |
| 97  | Q        | E        | Q        | E        | Q        | E        | Q        | E        | Q        | E        | Q        | E        | Q        | E        | Q        | E        | Q        | E        | Q        | E        |
| 98  | T        | E        | Q        | E        | Q        | E        | Q        | E        | Q        | E        | Q        | E        | E        | E        | Q        | E        | Q        | E        | Q        | E        |
| 99  | T        | E        | T        | E        | T        | E        | T        | E        | T        | E        | T        | E        | T        | E        | V        | E        | T        | E        | T        | E        |
| 100 | K        | E        | R        | E        | R        | E        | R        | E        | R        | E        | R        | E        | R        | E        | H        | E        | R        | E        | R        | E        |
| 101 | T        |          | K        | E        | K        | E        | K        | E        | K        | E        | K        | E        | K        | E        | K        | E        | K        | E        | K        | E        |
| 102 | T        |          | G        | E        | S        | E        | G        | E        | S        | E        | S        | E        | S        | E        | T        | E        | S        | E        | S        | E        |
| 103 | K        | E        | C        |          | C        |          | C        |          | C        |          | C        |          | C        |          | C        |          | C        |          | C        |          |
| 104 | E        | E        | P        |          | P        |          | P        |          | P        |          | P        |          | P        |          | P        |          | P        |          | P        |          |
| 105 | C        |          | D        | T        | G        | T        | D        | S        | A        | S        | D        | S        | D        | T        | Q        | S        | D        | T        | D        | T        |
| 106 | P        |          | G        | T        | G        | T        | G        | S        | G        | S        | G        | S        | G        | T        | G        | S        | G        | T        | G        | T        |
| 107 | E        | T        | W        |          | Y        |          | W        |          | Y        |          | W        |          | W        |          | W        |          | W        |          | W        |          |
| 108 | G        | T        | R        | E        | T        | E        | S        | E        | T        | E        | M        | E        | R        | E        | R        | E        | T        | E        | T        | E        |
| 109 | Y        |          | F        | E        | F        | E        | F        | E        | L        | E        | F        | E        | F        | E        | F        | E        | L        | E        | L        | E        |
| 110 | N        | E        | G        | H        | G        | G        | G        | T        | A        | T        | G        | S        | G        | T        | G        | H        | A        | H        | A        | H        |
| 111 | W        | E        | W        | H        | Y        | G        | W        | T        | K        | T        | F        | T        | W        | T        | W        | H        | K        | H        | K        | H        |
| 112 | D        |          | D        | H        | D        | G        | D        | T        | D        | T        | D        | T        | D        | T        | D        | H        | D        | H        | D        | H        |
| 113 | D        | S        | C        | H        | C        | G        | C        | T        | C        | T        | C        |          | C        | T        | C        | H        | C        | H        | C        | H        |
| 114 | <b>G</b> |          | <b>G</b> | <b>T</b> | <b>G</b> | <b>T</b> | <b>G</b> | <b>T</b> | <b>G</b> |          |          |          | <b>G</b> | <b>T</b> | <b>G</b> | <b>T</b> | <b>G</b> | <b>T</b> | <b>G</b> | <b>T</b> |
| 115 | <b>C</b> |          | <b>F</b> |          | <b>F</b> |          | <b>F</b> |          |          |          |          |          | <b>F</b> |          | <b>F</b> |          | <b>F</b> |          | <b>F</b> |          |
| 116 | <b>G</b> |          | <b>H</b> |          | <b>H</b> |          |          |          |          |          |          |          | <b>H</b> |          | <b>H</b> |          | <b>Y</b> |          | <b>Y</b> |          |
| 117 | <b>S</b> | <b>G</b> | <b>G</b> | <b>S</b> | <b>G</b> | <b>S</b> |          |          |          |          |          |          | <b>G</b> | <b>S</b> | <b>G</b> | <b>S</b> | <b>G</b> | <b>S</b> | <b>G</b> | <b>S</b> |
| 118 | <b>E</b> | <b>G</b> | <b>Y</b> | <b>T</b> | <b>W</b> | <b>T</b> |          |          |          |          |          |          | <b>Y</b> | <b>T</b> | <b>Y</b> | <b>T</b> | <b>Y</b> | <b>T</b> | <b>Y</b> | <b>T</b> |
| 119 | <b>L</b> | <b>G</b> | <b>G</b> | <b>T</b> | <b>G</b> | <b>T</b> |          |          | <b>G</b> |          | <b>G</b> |          | <b>G</b> | <b>T</b> | <b>G</b> | <b>T</b> | <b>G</b> | <b>T</b> | <b>G</b> | <b>T</b> |
| 120 | <b>G</b> |          | <b>Q</b> | <b>T</b> | <b>S</b> | <b>T</b> | <b>!</b> |          | <b>S</b> | <b>T</b> | <b>S</b> |          | <b>T</b> | <b>T</b> | <b>S</b> | <b>T</b> | <b>S</b> | <b>T</b> | <b>S</b> | <b>T</b> |
| 121 | <b>C</b> |          | <b>E</b> | <b>T</b> | <b>D</b> | <b>T</b> | <b>E</b> |          | <b>E</b> | <b>T</b> | <b>E</b> | <b>S</b> | <b>E</b> | <b>T</b> | <b>D</b> | <b>T</b> | <b>E</b> | <b>T</b> | <b>E</b> | <b>T</b> |
| 122 | <b>G</b> | <b>S</b> | <b>D</b> | <b>S</b> | <b>D</b> | <b>S</b> | <b>D</b> |          | <b>D</b> | <b>S</b> | <b>D</b> | <b>S</b> | <b>D</b> | <b>S</b> | <b>D</b> | <b>S</b> | <b>D</b> |          | <b>D</b> | <b>S</b> |
| 123 | <b>G</b> | <b>S</b> | <b>C</b> | <b>E</b> | <b>C</b> | <b>E</b> | <b>C</b> | <b>E</b> | <b>C</b> | <b>E</b> | <b>C</b> | <b>E</b> | <b>C</b> | <b>E</b> | <b>C</b> | <b>E</b> | <b>C</b> | <b>E</b> | <b>C</b> | <b>E</b> |
| 124 | <b>A</b> | <b>S</b> | <b>Y</b> | <b>E</b> | <b>Y</b> | <b>E</b> | <b>Y</b> | <b>E</b> | <b>Y</b> | <b>E</b> | <b>V</b> | <b>E</b> | <b>Y</b> | <b>E</b> | <b>Y</b> | <b>E</b> | <b>Y</b> | <b>E</b> | <b>Y</b> | <b>E</b> |
| 125 | <b>D</b> | <b>S</b> | <b>E</b> | <b>S</b> | <b>P</b> | <b>S</b> | <b>D</b> | <b>S</b> | <b>D</b> | <b>S</b> | <b>D</b> | <b>S</b> | <b>E</b> | <b>S</b> | <b>E</b> | <b>S</b> | <b>D</b> | <b>S</b> | <b>D</b> | <b>S</b> |
| 126 | <b>C</b> | <b>S</b> | <b>D</b> |          | <b>D</b> | <b>S</b> | <b>D</b> |          | <b>D</b> |          | <b>D</b> |          | <b>D</b> |          | <b>D</b> | <b>S</b> | <b>D</b> |          | <b>D</b> |          |
