# Supplementary material for: Immunization of cows with HIV envelope trimers generates broadly neutralizing antibodies to the V2-apex from the ultralong CDRH3 repertoire
Source: PubMed Central journal article supplement (PMC11412654; doi:10.1371/journal.ppat.1012042), 2024-09-09
Supplement: ppat.1012042.s020.pdf [file ppat.1012042.s020.pdf]

**S8 Table: Cryo-EM data collection, refinement and validation statistics.**

|                                                     | BG505 SOSIP + Bess4 Fab + RM20A3 Fab<br>(EMD-41498)<br>(PDB: 8TQ1) |
|-----------------------------------------------------|--------------------------------------------------------------------|
| <b>Data collection and processing</b>               |                                                                    |
| Microscope                                          | TFS Krios                                                          |
| Magnification                                       | 130,000x                                                           |
| Voltage (kV)                                        | 300                                                                |
| Electron exposure (e <sup>-</sup> /Å <sup>2</sup> ) | 55.5                                                               |
| Defocus range (µm)                                  | -0.7 to -1.7                                                       |
| Detector                                            | Gatan K2 Summit                                                    |
| Recording mode                                      | Counting                                                           |
| Pixel size (Å)                                      | 1.045                                                              |
| Symmetry imposed                                    | C1                                                                 |
| Micrographs (no.)                                   | 3,871                                                              |
| Initial particle images (no.)                       | 494,075                                                            |
| Final particle images (no.)                         | 82,374                                                             |
| Map resolution (Å)                                  | 3.3                                                                |
| FSC threshold                                       | 0.143                                                              |
| Map sharpening <i>B</i> factor (Å <sup>2</sup> )    | -83.5                                                              |
| Map pixel size (Å)                                  | 1.045                                                              |
| Map resolution range (Å)                            | 2.4-5.0                                                            |
| <b>Refinement</b>                                   |                                                                    |
| Initial model used (PDB code)                       | 6x9r                                                               |
| Model resolution (Å)                                | 3.3                                                                |
| FSC threshold                                       | 0.5                                                                |
| Model resolution range (Å)                          | 2.4-4.0                                                            |
| EMRinger score                                      | 3.95                                                               |
| Model composition                                   |                                                                    |
| Non-hydrogen atoms                                  | 19,788                                                             |
| Protein residues                                    | 2,400                                                              |
| Ligands                                             | 79                                                                 |
| Mean <i>B</i> factors (Å <sup>2</sup> )             |                                                                    |
| Protein                                             | 71                                                                 |
| Ligand                                              | 96                                                                 |
| R.m.s. deviations                                   |                                                                    |
| Bond lengths (Å)                                    | 0.006                                                              |
| Bond angles (°)                                     | 1.125                                                              |
| Validation                                          |                                                                    |
| MolProbity score                                    | 1.11                                                               |
| Clashscore                                          | 1.49                                                               |
| Poor rotamers (%)                                   | 0.19                                                               |
| Ramachandran plot                                   |                                                                    |
| Favored (%)                                         | 96.54                                                              |
| Allowed (%)                                         | 3.46                                                               |
| Disallowed (%)                                      | 0.00                                                               |
